# Supplementary material for: Prevalence and Penetrance of Rare Pathogenic Variants in Neurodevelopmental Psychiatric Genes in a Health Care System Population
Source: Atypon-hosted journal article supplement (doi:10.1176/appi.ajp.22010062), 2022-12-07
Supplement: appi.ajp.22010062.ds001.pdf [file appi.ajp.22010062.ds001.pdf]

## Methods

## References

**Figure S1.** Selection of genes included in the study

**Figure S2.** Ninety-seven percent (91/94) of NPD genes overlap with high-confidence genes in at least one other database

**Figure S3.** LOF variants allele frequency across genes in the DiscovEHR and gnomAD NFE populations

**Figure S4.** The frequency of pathogenic variants across genes in the VCRome and xGen sets

**Table S1.** Annotation of NPD genes across external databases

**Table S2.** ICD-9 and ICD-10 diagnoses codes for neurodevelopmental psychiatric and congenital anomalies

**Table S3.** Characteristics of participants with or without a variant or recurrent CNV

**Table S4.** Prevalence of pathogenic variants in each gene in DiscovEHR cohort

**Table S5.** Unique variants in NPD genes included in the study

**Table S6.** Neuropsychiatric developmental disorder diagnoses by gene

**Table S7.** Congenital anomaly diagnosis by gene

**Table S8.** Chart review of individuals with a variant in selected NPD genes

**Table S9.** Association between recurrent NPD-associated CNVs and NPD diagnosis in DiscovEHR cohort

**Table S10.** Association between LOF variants and NPD diagnosis in the European subset of participants sequenced on the VCRome platform (n=54,597)

**Table S11.** Association between LOF variants and NPD diagnosis in the European subset of samples sequenced on the IDT platform (n=27,130)

**Table S12.** Association between NPD genes pathogenic variants and NPD diagnosis in 1st and 2nd degree unrelated subset

**Table S13.** Association between NPD genes pathogenic variants and NPD diagnosis after exclusion of individuals age younger than 18 years

**Table S14.** Association between NPD genes pathogenic variants and NPD diagnosis after exclusion of individuals with intellectual disability

**Table S15.** Association between NPD genes pathogenic variants and NPD diagnosis in European ancestry and all non-Europeans

**Table S16.** Associations between variants in NPD genes and NPD diagnosis in Black or African Americans

**Table S17.** Associations between variants in NPD Genes and NPD diagnosis in Hispanic/Latino individuals

**Table S18.** Association between NPD genes pathogenic variants and NPD diagnosis based on control group without any NPD diagnoses

**Table S19.** Association between NPD-associated CNVs and NPD diagnosis based on control group without any NPD diagnoses

## Methods

### Variants Quality Control (QC)

Single nucleotide variants (SNVs) and indels were identified after applying stringent quality metric parameters: allelic balance (AB) 0.2, genotype depth (DP) 20, and genotype quality (GQ) 80. Variants were excluded if located in segmental duplication/repetitive regions or outside of consistently covered exome regions (bases covered at >20x in 90% of VCRome samples and covered at >20x in 90% of xGen samples) between the two sequencing platforms (VCRome set and xGen set) used for sequencing of the first ~61K and ~31K samples (1). After applying the QC metrics above, LOF variants in NPD genes are distributed across both sequencing platforms (Figure S4). A total of 59,441 of the 90,595 samples that passed QC were in the VCRome set, while 31,154 were in the xGen set. To minimize the number of potentially false positive variants, all variants involving substitution or deletion of more than one nucleotide (indels) were confirmed by evaluation of IGV plots in at least two samples when observed in multiple individuals. We included only variants on autosomes. Single gene copy number variants (CNVs) were called from ES data and were confirmed by an array-based call (with 10 or more SNPs) using PennCNV or manual inspection of the signal intensity data (logR and B-allele frequency) within the pathogenic region as described previously (2, 3). Exome sequencing CNV calls involving two or more exons and validated by 10 or more SNPs were included in our analysis.

### **Rare Pathogenic Loss-Function-Variants Identification**

Variants were annotated with Ensembl Variant Effect Predictor (VEP) version 95 based on ensemble gene build 96. Ensemble canonical transcript was selected. Based on the selected transcript (Table S1), loss-of-function (LOF) variants (frameshift, nonsense, essential (+/- 1,2) splice site, stop-loss, and start-loss variants); were functionally annotated with LOFTEE (4), to identify “high-confidence” and “low-confidence” variants. Rare variants were identified by exclusion of variants with minor allele frequency (MAF) of  $\geq 0.001$  in either the DiscovEHR cohort or gnomAD. Rare LOF variants and single gene CNVs were evaluated for evidence of pathogenicity following the general framework of ACMG-AMP guidelines (5–7). Only variants classified as pathogenic or likely pathogenic were included in prevalence, penetrance, and effect size estimates. *KANSL1* variants in exons 1-3 were excluded due to potential loss of function variants artefacts from copy-number polymorphic segmental duplications encompassing exons 1-3 (8).

### **NPD Genes Selection and Annotation Across External Sources**

NPD genes were selected from high-confidence candidate genes (Tier 1) in the Developmental Brain Disorder (DBD) Gene Database (<https://dbd.geisingeradmi.org/>; accessed January 2021) (9). Of the 152 Tier 1 genes, we restricted our analysis to 94 high-confidence NPD genes that met the following three criteria: 1) autosomal dominant inheritance, 2) haploinsufficiency (LOF mechanism), and 3) strong evidence for NPD association, either by having the highest confidence ranking in at least one externally curated NPD gene database; or by being reported in six or more probands curated by

the DBD Gene Database. Genes on the X -chromosome were excluded from this study (see Figures S1 and S2 in the online supplement). Tier 1 genes were considered supported by an external database if ranked as having the highest confidence of association with NPD in the respective database: SFARI genes with an assigned gene score of 1 (SFARI Gene: <https://gene.sfari.org/>; accessed February 2021); Development Disorder Genotype-Phenotype (DDG2P) genes “Confirmed” to cause neurodevelopmental disorder (DDG2P: <https://www.deciphergenomics.org/ddd/ddgenes>; accessed February 2021); and denovo-db genes (<https://denovo-db.gs.washington.edu/denovo-db/>; accessed February 2021) with likely gene disruption (LGD) that met a genome-wide statistical significance threshold for association with a neurodevelopmental disorder (10).

We performed an intersection between the 94 NPD genes and three active NPD gene curation databases to support disease causality: SFARI (11), DDG2P (12), and denovo-db. Nearly all NPD genes (n=91, 97%,) are supported by at least one external database as they were categorized as high-confidence genes in the respective databases (see Table S1, Figure S2 in the online supplement). Consistent with the expectations of monogenic NPD genes, namely strong selective pressure and rarity of loss-of-function variants in the general population, our list of NPD genes is enriched for constraint (n=89; 95%) based on the probability of loss-of-function intolerance (pLI) metric in gnomAD (pLI >0.9). As of January 2021, the Clinical Genome Resource (ClinGen) has curated and scored 76 of the 94 NPD genes for haploinsufficiency: 67 are scored 3 (sufficient evidence), and 9 are scored 2 (emerging evidence). ClinGen

curated 42 of the 94 genes and classified 41 with definitive and 1 with moderate evidence of gene-disease relationship (see Table S1 in the online supplement).

### **Identification of LOF variants Observed in the gnomAD Non-Finnish-European (NFE) population**

The gnomAD v2.1.1 all chromosomes sites VCF (<https://gnomad.broadinstitute.org/downloads>: Accessed May 2022) was used to identify LOF variants in NPD genes observed in the gnomAD population (13). Variants in NPD genes passing gnomAD QC filters (FILTER=PASS), without Segdup, LCR, or decoy flags were identified. To subset gnomAD variants to genomic regions included in exome sequences from our study, the genomic positions of gnomAD variants in NPD genes were intersected with consistently covered bases (described above). LOF variants in each of the 94 genes observed in gnomAD were identified after annotation of the VCF with VEP version 103 using the same transcripts listed in Table S1. Because DiscovEHR is largely White Europeans, we compared DiscovEHR's variant frequency to gnomAD NFE population. *KANSL1* variants in exons 1-3 were also excluded from the list of variants observed in the gnomAD NFE population. The gnomAD frequency across genes was calculated by dividing the total number LOF alleles by the median number of LOF alleles. The difference in LOF variant frequency between gnomAD and DiscovEHR datasets could be attributed to differences in the frequency of pathogenic LOF variants and/or variant quality thresholds used in gnomAD (GQ $\geq$ 20, DP $\geq$ 10, and allele balance  $>0.2$ ) and our study (GQ $\geq$ 80, DP $\geq$ 20, and allele balance  $>0.2$ ). We also examined single gene CNVs in the gnomAD SV (structural variant) dataset from 10,738

unrelated genomes, however none of the CNVs included in our study have been observed in the gnomAD SV dataset.

### **NPD Diagnosis Extraction**

NPD diagnoses were extracted from the participant's EHR ICD 9/10 *billing codes* (see Table S2 in the online supplement). Billing codes used here have been described by our group previously and were used to evaluate phenotypes associated with NPD in the DiscovEHR cohort (2). Selected ICD9/10 billing codes were intended to capture "neurodevelopmental disorders," "schizophrenia spectrum and other psychotic disorders," "bipolar and related disorders," "depressive disorders," "anxiety disorders," "obsessive-compulsive and related disorders," "epilepsy," and "cerebral palsy". The presence of a congenital anomaly, including cleft lip/palate, as well as structural malformations of the central nervous, cardiac, and urogenital systems, was defined as described in our previous analysis (2). Clinical diagnosis data were collected in December 2020.

### **Sensitivity Analyses**

We conducted a sensitivity analysis to ensure that the odds ratio estimates for NPD disorders based on the entire dataset are consistent with OR estimates based on case-control samples from each of the two sequencing platforms. For this sensitivity analysis, the odds ratios were calculated using the European samples of the VCRome (n=54,597) or IDT (n=27,130) sets. We also performed association analysis using an unrelated subset of the cohort (n=64,914) (1), which included one sample from each 1<sup>st</sup> and 2<sup>nd</sup> degree related families in DiscovEHR, to account for potential effects of relatedness on

the association between pathogenic variants and NPD diagnosis. To account for the effects of pediatric patient participants (i.e., age group which may disproportionately have a high frequency of NPD diagnosis) and patients with intellectual disability (NPD outcome with the highest odds ratio) on the association between pathogenic variants and NPD diagnosis, case-control analysis was performed after excluding pediatric participants (age <18) and those with ID diagnosis from the case-control analysis. Because all case-control analyses were conducted using the DiscovEHR cohort's European subset, the effects of pathogenic variants in Black/African American and White Hispanic/Latino minority populations were also investigated in separate analysis. We conducted case-control study of the association between NPD and pathogenic variants or CNVs, classifying cases as those with the specific diagnosis and controls as those without any of the 14 NPD, accounting for the well-established phenotypic variability of NPDs because those with any of the NPD are considered affected cases and were not included in the control group for each test.

### **Chart Review Methodology**

To supplement our analysis of NPD identification based on ICD codes, we performed a manual chart review of 27 individuals with a pathogenic variant in 11 of the 94 NPD genes expected to be fully penetrant for the associated disorder. To identify fully penetrant genes, penetrance of all 61 genes with  $\geq 1$  individual in DiscovEHR population cohort with a variant were systematically extracted from the "Penetrance" section in each GeneReviews (<http://www.genereviews.org/>) accessed April 2021. Of the 61 genes, 10 (*EFTUD2*, *TSC2*, *STXBP1*, *CHD2*, *GRIN2B*, *KMT2D*, *KANSL1*, *NSD1*, *TCF4*

and WAC) genes were listed as being fully penetrant for the respective genetic disorder. Individuals with *CHD8* pathogenic variant were also included in manual chart review, despite the fact that the gene is not included in GeneReviews, because variants in this gene have been reported to have high penetrance for ASD (10).

Systematic, manual chart reviews were conducted in Epic EHRs. Coded incidents of current and past diagnoses were reviewed, along with biometrics (head circumference, height, BMI), social history (educational attainment, occupational history) and medication use. The search feature was used to identify NPD phenotypes for each patient that were captured in visit notes or encounter documentation and were otherwise absent from ICD code lists. Scanned documents (not text searchable) were omitted from this analysis.

Through chart review, we captured:

- **Length of EHR (years)**
  - **Methods:**
    - Open chart Click to “Load All Records Now” Note date of most recent encounter Sort oldest to newest Note date of first documented encounter
    - Open chart Click to “Load All Records Now” Click Filters Click Encounter Department Review variety of departments and visit counts
  - **Justification:** short duration or seen only for labs/specialty care could mean that the lack of NPD evidence comes from minimal documentation as opposed to absence of phenotype
- **Educational attainment**
  - **Methods:**
    - Open chart Click History tab Click “Socioeconomic” subtab (within Social Determinants) Note Years of Education (if documented)
    - Key term search: /edu/ or educate or education or school or high school or “HS” or college or degree or “GED” or graduate or graduation or special education or learning support
  - **Justification:** school psychological testing, notes from teachers, classroom placement (special ed, autism support, emotional



support, with a 1:1 aide) and school therapies (speech, OT, PT) can all indirectly suggest NPD history

- **Occupation**

- **Methods:**

- Open chart Click Demographics tab Note Employment Information (Occupation, Employer) (if documented) Click to View Employer for more details (if available)
    - Key term search: work or works or job or occupation or employer or employment or retired or homemaker or disability or on disability

- **Justification:** if on disability, clinicians may have documented qualifying incident(s), which may include seizure on the job, mood disorder interfering with ability to work, etc.

- **NPD Phenotypes**

- **Methods:**

- Open chart Click Snapshot tab Review diagnoses in problem list (should be captured by ICD code pull) Click History tab Review diagnoses in Past Medical History List

- Key term search:

- psych or psychology or psychiatry or psychologist or psychiatrist or psychosis or psychotic or mental health or neurodevelopment
      - gene or genetic or exome or genome or variant or mutation
      - cognition or cognitive or /cogn/ or intelligence or intelligence quotient or /intel/ or "IQ" or "FSIQ" or learning or "barriers to learning" or mental or mental retardation or "MR" or developmental delay or delay or remedial or regression
      - anxiety or anxious or phobia or panic or depression or depressed or mood or mood disorder or adjustment or adjustment disorder or bipolar or schizophrenia or /schiz/ or delusion
      - post-traumatic stress disorder or trauma or "PTSD" or /suicid/
      - autism or autism spectrum disorder or "ASD" or asperger or asperger syndrome or pervasive developmental disorder or "PDD" or "PDD-NOS" or social communication
      - seizure or epilepsy or convulsion or convulsive or "EEG" or "MRI" or migraine or neuro or neurology or neuropathy or neuroscience or neurologist
      - speech or language or speech delay or language delay or language disorder or speech disorder or

specific language disorder or symbolic dysfunction or phonological or speech therapy or communication disorder or communication deficit or verbal or nonverbal or hearing loss

- attention deficit or “ADHD” or impulsivity or impulsive or hyperactive or hyperkinetic or hyperkinesis or motor or motor delay or motor disorder or cerebral palsy or “CP” or stereotypy or coordination or coordination disorder or obsessive-compulsive disorder or “OCD” or compulsive or repetitive

- **Biometrics (height, weight, BMI, head circumference)**

- Methods:

- Open chart Review Recent Vitals for Height, Weight, BMI (if applicable)
- Open chart Click Growth Chart tab (if available) Note Recent Height, Weight, BMI and relative percentiles by age
- Key term search: head or head circumference or head size or Nellhaus or Nellhaus curve or normocephalic or “HEENT”

## REFERENCES

1. Staples J, Maxwell EK, Gosalia N, et al.: Profiling and Leveraging Relatedness in a Precision Medicine Cohort of 92,455 Exomes. *Am J Hum Genet* 2018; 102:874–889
2. Martin CL, Wain KE, Oetjens MT, et al.: Identification of Neuropsychiatric Copy Number Variants in a Health Care System Population [Internet]. *JAMA Psychiatry* 2020; Available from: <http://dx.doi.org/10.1001/jamapsychiatry.2020.2159>
3. Wang K, Li M, Hadley D, et al.: PennCNV: an integrated hidden Markov model designed for high-resolution copy number variation detection in whole-genome SNP genotyping data. *Genome Res* 2007; 17:1665–1674
4. Karczewski K: loftee [Internet]. Github[cited 2021 Jan] Available from: <https://github.com/konradjk/loftee>
5. Richards S, Aziz N, Bale S, et al.: Standards and guidelines for the interpretation of sequence variants: a joint consensus recommendation of the American College of Medical Genetics and Genomics and the Association for Molecular Pathology. *Genet Med* 2015; 17:405–424
6. Tayoun AA, Pesaran T, DiStefano M, et al.: Recommendations for Interpreting the Loss of Function PVS1 ACMG/AMP Variant Criteria [Internet]. *bioRxiv* 2018; 313718[cited 2018 Sep 6] Available from: <https://www.biorxiv.org/content/early/2018/05/09/313718>
7. Riggs ER, Andersen EF, Cherry AM, et al.: Technical standards for the interpretation and reporting of constitutional copy-number variants: a joint consensus recommendation of the American College of Medical Genetics and Genomics (ACMG) and the Clinical Genome Resource (ClinGen). *Genet Med* 2020; 22:245–257
8. Koolen DA, Pfundt R, Linda K, et al.: The Koolen-de Vries syndrome: a phenotypic comparison of patients with a 17q21.31 microdeletion versus a KANSL1 sequence variant. *Eur J Hum Genet* 2016; 24:652–659
9. Gonzalez-Mantilla AJ, Moreno-De-Luca A, Ledbetter DH, et al.: A Cross-Disorder Method to Identify Novel Candidate Genes for Developmental Brain Disorders. *JAMA Psychiatry* 2016; 73:275–283
10. Coe BP, Stessman HAF, Sulovari A, et al.: Neurodevelopmental disease genes implicated by de novo mutation and copy number variation morbidity. *Nat Genet* 2019; 51:106–116
11. Abrahams BS, Arking DE, Campbell DB, et al.: SFARI Gene 2.0: a community-driven knowledgebase for the autism spectrum disorders (ASDs). *Mol Autism* 2013; 4:36
12. Wright CF, Fitzgerald TW, Jones WD, et al.: Genetic diagnosis of developmental disorders in the DDD study: a scalable analysis of genome-wide research data. *Lancet* 2015; 385:1305–1314
13. Karczewski KJ, Francioli LC, Tiao G, et al.: The mutational constraint spectrum quantified from variation in 141,456 humans. *Nature* 2020; 581:434–443

## Figure S1. Selection of genes included in the study

### Tier 1 genes (n=152)

TLK2 MYT1L STAG1 TBR1 PDHA1 WASF1 SCN2A USP7 CUL3 ASXL2 AHDC1 KIF11 CAMK2A KCNQ2 KMT2B CHD8 SRCAP KDM5B SON SATB2 PTEN CSDE1 EP300 TRIO RIMS1 PHIP ASXL3 SLC35A2 ITSN1 SETD2 SHANK2 ZMYND11 CAMK2B SETD1A PTCHD1 DLG4 CHAMP1 SETBP1 SMARCC2 NSD1 NIPBL SHANK3 POGZ GATAD2B HDAC8 KMT2D CHD3 ANK2 NRXN1 KAT6A NAA15 DYRK1A CREBBP RORA RALGAPB AUTS2 TRIP12 MED13L SYNGAP1 MBD5 EFTUD2 TSC2 NUS1 ARID1B DDX3X HNRNPU KDM6A ZBTB18 IL1RAPL1 NSD2 CASK MECP2 ZNF462 WAC GPC3 GRIN2B BRPF1 ZNF292 STXBP1 EHMT1 RAI1 GIGYF1 HIVEP2 FOXP1 STAG2 CTCF CHD7 WDFY3 TCF20 MYH10 MAPK8IP3 SMC1A TCOF1 NEXMIF KMT2C SOX5 CLTC DSCAM NFIX ANKRD11 SLC6A1 KDM5C CSNK2B EBF3 TCF4 PAX6 PPP3CA PPM1D KAT6B WDR45 H1-4 IRF2BPL DPP6 CTNNB1 PRR12 ARHGEF9 SLC2A1 NBEA PHF3 PHF21A KMT2A ZEB2 SOX11 HIVEP3 CTTNBP2 SPAST KANSL1 CDKL5 UPF3B ASH1L CDK13 SETD5 CIC TNRC6B FOXG1 ADNP USP9X IQSEC2 MEF2C CHD2 PCDH19 KMT5B SLC9A6 KDM6B PURA BCL11A NCKAP1 SCN1A ASXL1 DNMT3A MAGEL2 UBE3A

**Exclude imprinted genes (n=2):** UBE3A MAGEL2

**Exclude genes associated with age related clonal hematopoiesis (n=3):** ASXL1 DNMT3A PPM1D

**Exclude genes on X-chromosome (n=22):** IL1RAPL1 CDKL5 UPF3B PTCHD1 WDR45 SMC1A NEXMIF CASK

**Exclude genes associated with syndromes ID/ASD is not primary features (n=3):** PAX6 SPAST TCOF1

**Exclude genes linked with both recessive and dominant inheritance (n=5):** KDM5B KDM6B NRXN1 SLC2A1 NUS1

**Exclude genes with ClinGen HI score 1, or known dominant negative (n=6):** ASXL2 HIVEP3 PHF3 RIMS1 SRCAP H1-4

**Exclude genes with dominant negative loss of function mechanism (n=2):** CDK13 and CHD3

### Autosomal dominant genes with haploinsufficiency disease mechanism (n=109)

ZBTB18 TLK2 NSD2 MYT1L STAG1 TBR1 ZNF462 WAC GRIN2B BRPF1 WASF1 SCN2A ZNF292 USP7 STXBP1 CUL3 RAI1 EHMT1 HIVEP2 GIGYF1 AHDC1 FOXP1 CTCF KIF11 CAMK2A KCNQ2 CHD7 WDFY3 TCF20 MYH10 KMT2B MAPK8IP3 CHD8 KMT2C SON SATB2 SOX5 PTEN CLTC DSCAM CSDE1 EP300 NFIX TRIO SLC6A1 PHIP ANKRD11 ASXL3 ITSN1 SETD2 CSNK2B EBF3 TCF4 SHANK2 ZMYND11 CAMK2B PPP3CA PPM1D KAT6B SETD1A DLG4 CHAMP1 SETBP1 IRF2BPL PRR12 CTNNB1 DPP6 SMARCC2 NBEA NSD1 PHF21A NIPBL SHANK3 KMT2A ZEB2 POGZ GATAD2B SOX11 CTTNBP2 KMT2D KANSL1 ANK2 KAT6A DYRK1A NAA15 CREBBP SETD5 ASH1L CIC TNRC6B RORA ADNP FOXG1 RALGAPB AUTS2 TRIP12 MED13L MEF2C CHD2 SYNGAP1 KMT5B MBD5 EFTUD2 TSC2 PURA ARID1B BCL11A NCKAP1 SCN1A HNRNPU

**Exclude genes not supported by external NPD genes databases (SFARI, DDG2P, Denovodb) (n=18):** PPP3CA NSD2 CAMK2A MYH10 KMT2B MAPK8IP3 RORA DPP6 RALGAPB SOX11 WASF1 CTTNBP2 USP7 ITSN1 CSNK2B ZMYND11 CAMK2B.

### Autosomal dominant genes with haploinsufficiency disease mechanism supported by external database (n=91)

ZBTB18 TLK2 MYT1L STAG1 TBR1 ZNF462 WAC GRIN2B BRPF1 SCN2A ZNF292 STXBP1 CUL3 RAI1 EHMT1 HIVEP2 GIGYF1 AHDC1 FOXP1 CTCF KIF11 KCNQ2 CHD7 WDFY3 TCF20 CHD8 KMT2C SON SATB2 SOX5 PTEN CLTC DSCAM EP300 NFIX TRIO SLC6A1 PHIP ANKRD11 ASXL3 SETD2 EBF3 TCF4 SHANK2 KAT6B DLG4 CHAMP1 SETBP1 IRF2BPL PRR12 CTNNB1 NBEA NSD1 PHF21A NIPBL SHANK3 KMT2A ZEB2 POGZ GATAD2B KMT2D KANSL1 ANK2 KAT6A DYRK1A NAA15 CREBBP SETD5 ASH1L CIC TNRC6B ADNP FOXG1 AUTS2 TRIP12 MED13L MEF2C CHD2 SYNGAP1 KMT5B MBD5 EFTUD2 TSC2 PURA ARID1B BCL11A NCKAP1 SCN1A HNRNPU SETD1A

**Include Genes with 6 or more de novo LOFs in the DBD genes database (n=3):** Genes with sufficient genetic evidence; published reports of 6 or more de novo pLOF variants among unrelated NPD affected probands in the DBD genes database. NSD2 USP7 WASF1

**Total number of genes included in the study: n=94**

**Figure S2. Ninety-seven percent (91/94) of NPD genes overlap with high-confidence genes in at least one other database**

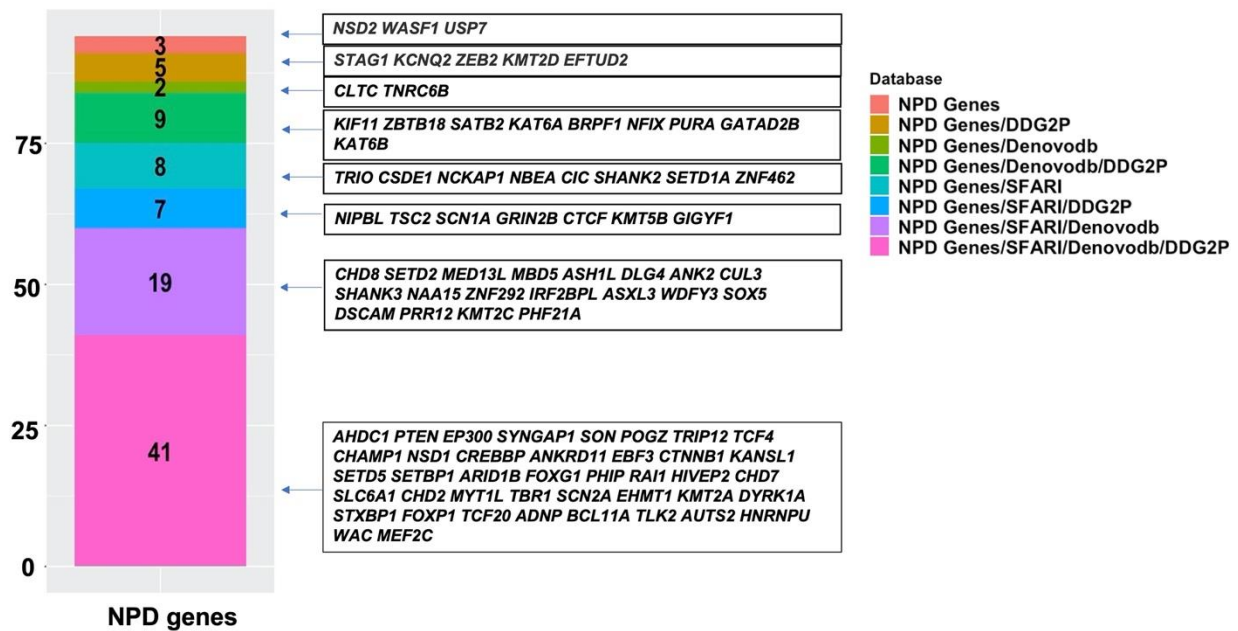

Ninety-four NPD genes were compared with SFARI genes with Score 1, DDG2P genes annotated as “Confirmed”, and Denovo-db genes with likely gene disruption (LGD) variants (10).  
 SFARI: Simons Foundation Autism Research Initiative  
 DDG2P: Developmental Disorder Genotype-phenotype database

**Figure S3. LOF variants allele frequency across genes in the DiscovEHR and gnomAD NFE populations**

**(A)** The LOF variant allele frequency of genes observed in five or more individuals in DiscovEHR. AF: Allele frequency

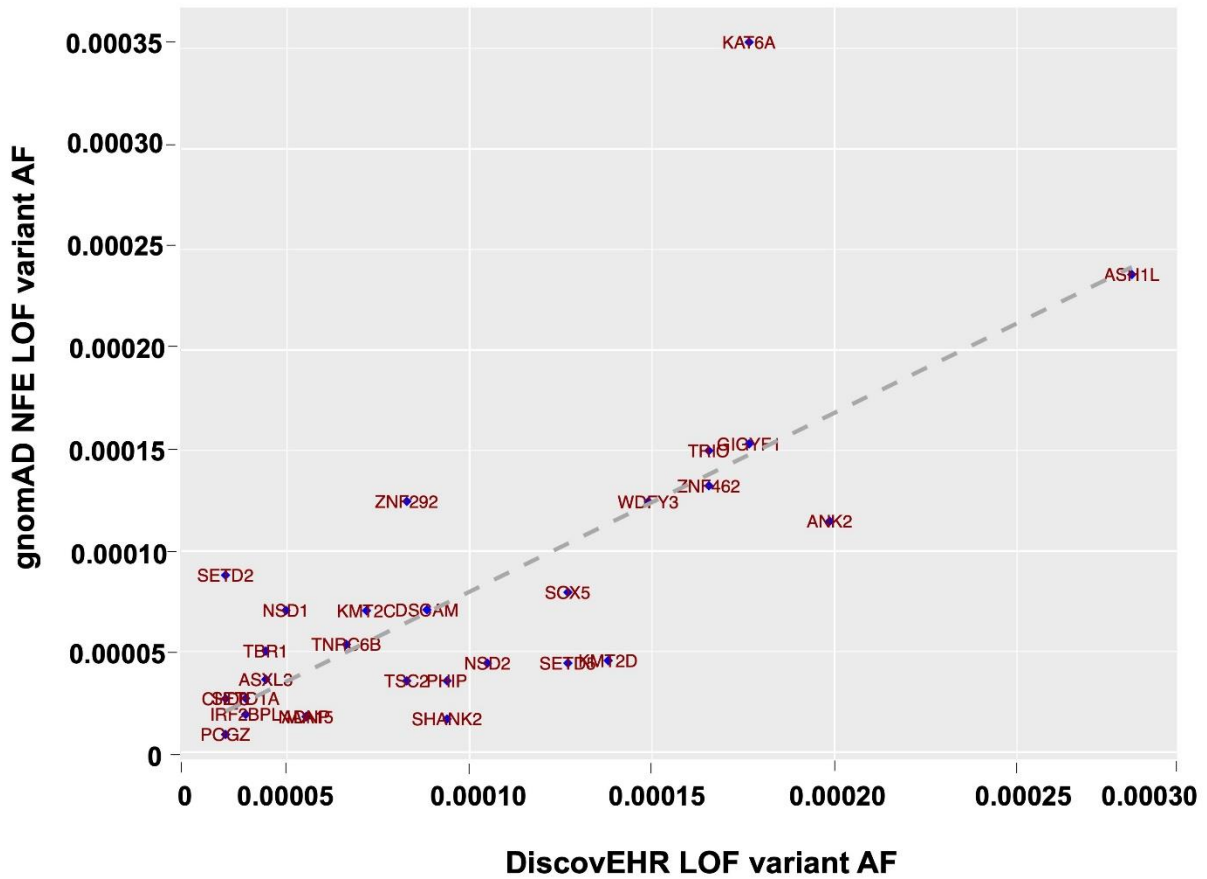

**(B)** LOF variant allele frequency of all genes with at least one LOF variant observed in both populations.

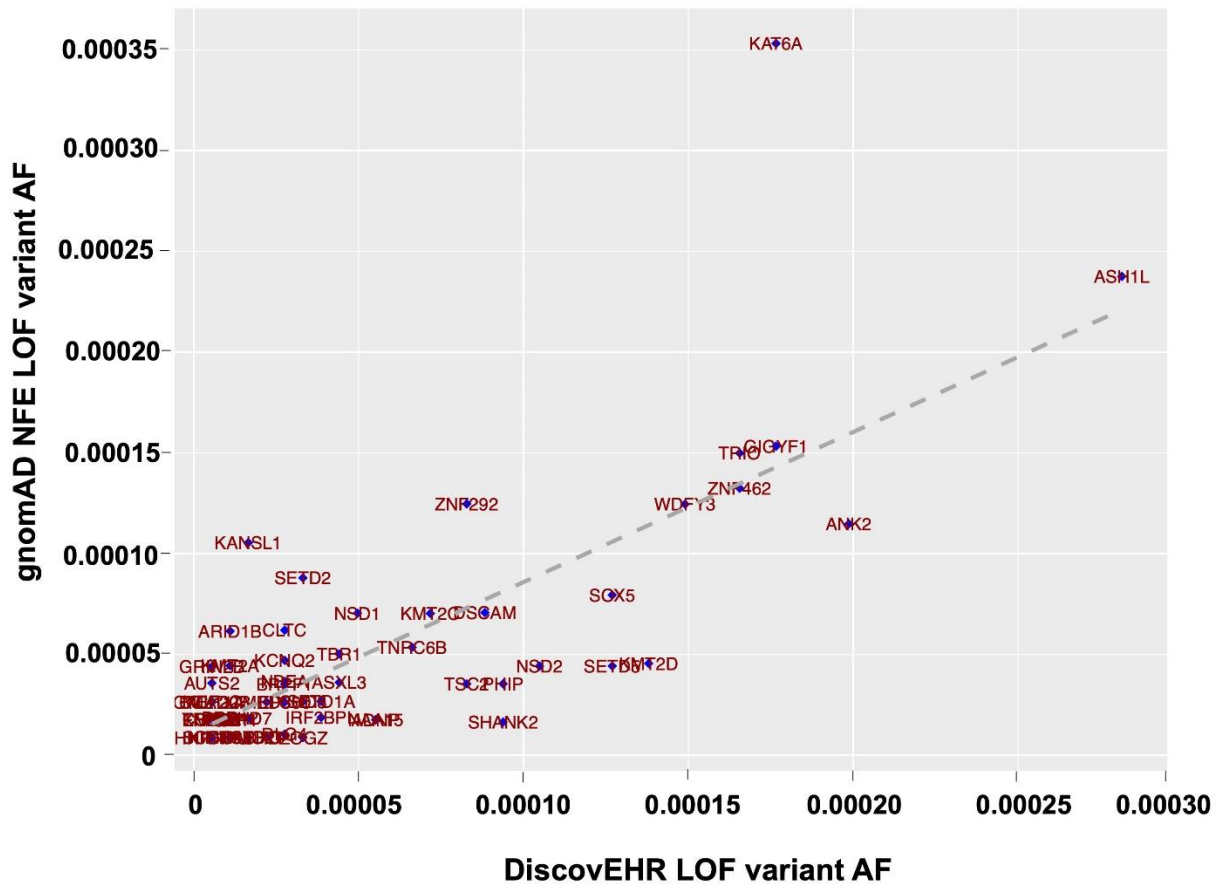

**Figure S4. The frequency of pathogenic variants across genes in the VCRome and xGen sets**

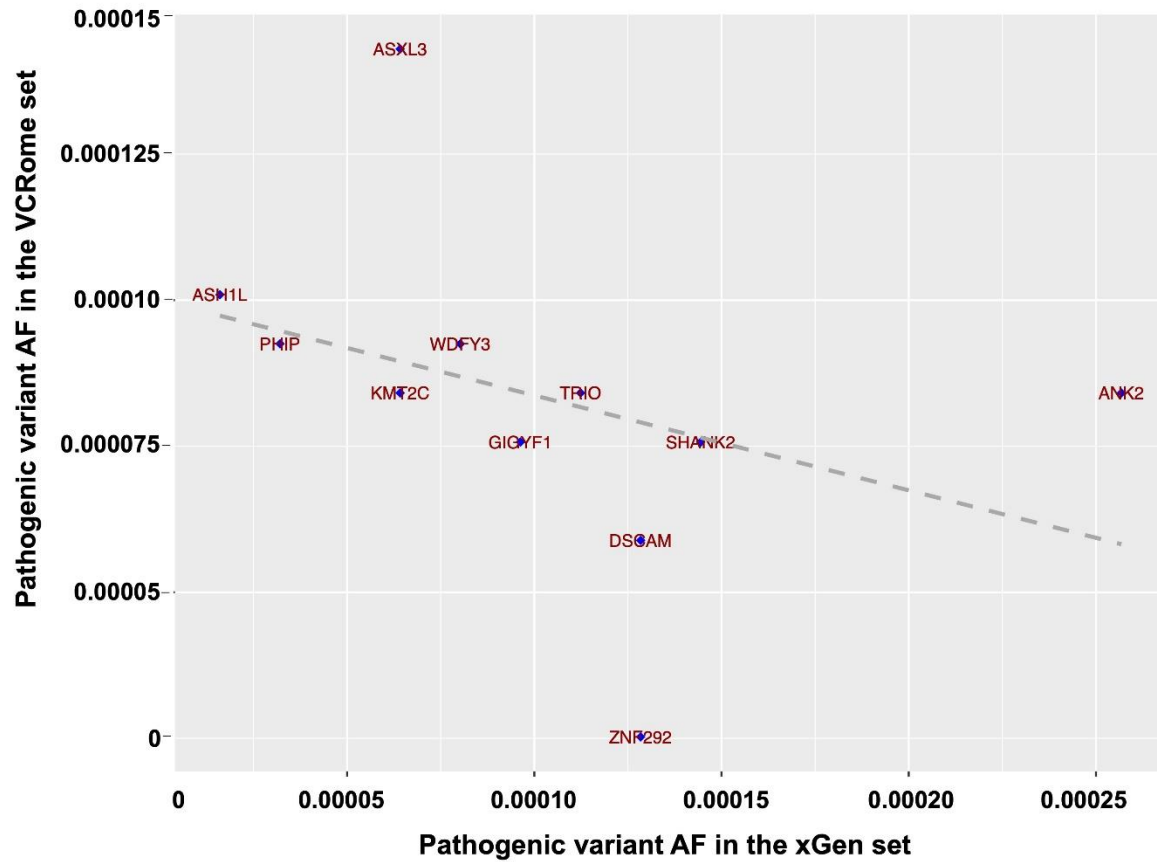

The frequency of pathogenic variants (including sequence variants and CNVs) across genes with the highest frequency ( $\geq 10$  variants in the whole dataset) are shown for VCRome (n=59,441) and xGen (n=31,154) sets.



**Table S1. Annotation of NPD genes across external databases**

| Gene           | NCBI Reference sequence | gnomAD PLI | gnomAD LOEUF | ClinGen HI score | ClinGen Gene-disease validity; MONDO DISEASE ID: Classification | DDG2P category | SFARI gene-score <sup>a</sup> | Overlap with Denovo-db NDD genes <sup>b</sup> |
|----------------|-------------------------|------------|--------------|------------------|-----------------------------------------------------------------|----------------|-------------------------------|-----------------------------------------------|
| <i>ADNP</i>    | NM_001282531            | 1.00       | 0.123        | 3                | MONDO_0014379 :<br>Definitive                                   | confirmed      | 1                             | Yes                                           |
| <i>AHDC1</i>   | NM_001029882            | 1.00       | 0.076        | 3                | -                                                               | confirmed      | 1                             | Yes                                           |
| <i>ANK2</i>    | NM_001148               | 1.00       | 0.106        | 3                | MONDO_0100038 :<br>Definitive                                   | possible       | 1                             | Yes                                           |
| <i>ANKRD11</i> | NM_013275               | 1.00       | 0.107        | 3                | MONDO_0007846 :<br>Definitive                                   | confirmed      | 1                             | Yes                                           |
| <i>ARID1B</i>  | NM_001346813            | 1.00       | 0.102        | 3                | MONDO_0015452 :<br>Definitive                                   | confirmed      | 1                             | Yes                                           |
| <i>ASH1L</i>   | NM_018489               | 1.00       | 0.062        | 3                | -                                                               | probable       | 1                             | Yes                                           |
| <i>ASXL3</i>   | NM_030632               | 1.00       | 0.199        | 3                | -                                                               | probable       | 1                             | Yes                                           |
| <i>AUTS2</i>   | NM_015570               | 1.00       | 0.253        | 3                | MONDO_0000508 :<br>Definitive                                   | confirmed      | 1                             | Yes                                           |
| <i>BCL11A</i>  | NM_022893               | 0.97       | 0.322        | 3                | MONDO_0014914 :<br>Definitive                                   | confirmed      | 1                             | Yes                                           |
| <i>BRPF1</i>   | NM_004634               | 1.00       | 0.176        | -                | -                                                               | confirmed      | -                             | Yes                                           |
| <i>CHAMP1</i>  | NM_032436               | 0.99       | 0.271        | 2                | -                                                               | confirmed      | 1                             | Yes                                           |
| <i>CHD2</i>    | NM_001271               | 1.00       | 0.07         | 3                | MONDO_0100038 :<br>Definitive                                   | confirmed      | 1                             | Yes                                           |
| <i>CHD7</i>    | NM_017780               | 1.00       | 0.076        | 3                | MONDO_0008965 :<br>Definitive                                   | confirmed      | 1                             | Yes                                           |
| <i>CHD8</i>    | NM_001170629            | 1.00       | 0.082        | 3                | MONDO_0005258 :<br>Definitive                                   | probable       | 1                             | Yes                                           |
| <i>CIC</i>     | NM_001304815            | 1.00       | 0.183        | 2                | -                                                               | probable       | 1                             | NA                                            |
| <i>CLTC</i>    | NM_004859               | 1.00       | 0.104        | -                | -                                                               | probable       | -                             | Yes                                           |
| <i>CREBBP</i>  | NM_004380               | 1.00       | 0.066        | 3                | MONDO_0008393 :<br>Definitive                                   | confirmed      | 1                             | Yes                                           |
| <i>CSDE1</i>   | NM_001007553            | 1.00       | 0.144        | -                | -                                                               | -              | 1                             | NA                                            |
| <i>CTCF</i>    | NM_006565               | 1.00       | 0.148        | 2                | -                                                               | confirmed      | 1                             | NA                                            |
| <i>CTNNB1</i>  | NM_001904               | 1.00       | 0.129        | 3                | -                                                               | confirmed      | 1                             | Yes                                           |
| <i>CUL3</i>    | NM_003590               | 1.00       | 0.228        | 2                | MONDO_0100038 :<br>Definitive                                   | possible       | 1                             | Yes                                           |
| <i>DLG4</i>    | NM_001365               | 1.00       | 0.238        | -                | -                                                               | probable       | 1                             | Yes                                           |
| <i>DSCAM</i>   | NM_001389               | 1.00       | 0.189        | 3                | -                                                               | -              | 1                             | Yes                                           |
| <i>DYRK1A</i>  | NM_001347721            | 1.00       | 0.214        | 3                | MONDO_0100038 :<br>Definitive                                   | confirmed      | 1                             | Yes                                           |
| <i>EBF3</i>    | NM_001005463            | 1.00       | 0.15         | -                | -                                                               | confirmed      | 1                             | Yes                                           |
| <i>EFTUD2</i>  | NM_004247               | 1.00       | 0.094        | 3                | -                                                               | confirmed      | -                             | NA                                            |
| <i>EHMT1</i>   | NM_024757               | 1.00       | 0.072        | 3                | MONDO_0012455 :<br>Definitive                                   | confirmed      | 1                             | Yes                                           |
| <i>EP300</i>   | NM_001429               | 1.00       | 0.099        | 3                | -                                                               | confirmed      | 1                             | Yes                                           |
| <i>FOXP1</i>   | NM_005249               | 0.94       | 0.329        | 3                | MONDO_0100040 :<br>Definitive                                   | confirmed      | 1                             | Yes                                           |
| <i>FOXP1</i>   | NM_032682               | 1.00       | 0.175        | 3                | MONDO_0013352 :<br>Definitive                                   | confirmed      | 1                             | Yes                                           |
| <i>GATAD2B</i> | NM_020699               | 1.00       | 0.097        | 3                | -                                                               | confirmed      | -                             | Yes                                           |
| <i>GIGYF1</i>  | NM_022574               | 0.00       | 0.484        | -                | -                                                               | confirmed      | 1                             | NA                                            |
| <i>GRIN2B</i>  | NM_000834               | 1.00       | 0.061        | 3                | MONDO_0100038 :<br>Definitive                                   | confirmed      | 1                             | NA                                            |
| <i>HIVEP2</i>  | NM_006734               | 1.00       | 0.08         | 3                | -                                                               | confirmed      | 1                             | Yes                                           |
| <i>HNRNPU</i>  | NM_031844               | 1.00       | 0.114        | -                | -                                                               | confirmed      | 1                             | Yes                                           |

| Gene           | NCBI Reference sequence | gnomAD PLI | gnomAD LOEUF | ClinGen HI score | ClinGen Gene-disease validity; MONDO DISEASE ID: Classification | DDG2P category | SFARI gene-score <sup>a</sup> | Overlap with Denovo-db NDD genes <sup>b</sup> |
|----------------|-------------------------|------------|--------------|------------------|-----------------------------------------------------------------|----------------|-------------------------------|-----------------------------------------------|
| <i>IRF2BPL</i> | NM_024496               | 0.84       | 0.405        | -                | -                                                               | probable       | 1                             | Yes                                           |
| <i>KANSL1</i>  | NM_015443               | 1.00       | 0.238        | 3                | -                                                               | confirmed      | 1                             | Yes                                           |
| <i>KAT6A</i>   | NM_006766               | 1.00       | 0.069        | 3                | -                                                               | confirmed      | 2                             | Yes                                           |
| <i>KAT6B</i>   | NM_012330               | 1.00       | 0.128        | 3                | -                                                               | confirmed      | 3                             | Yes                                           |
| <i>KCNQ2</i>   | NM_172106               | 1.00       | 0.158        | 3                | MONDO_0018614 :<br>Definitive                                   | confirmed      | 2                             | NA                                            |
| <i>KIF11</i>   | NM_004523               | 1.00       | 0.121        | 3                | -                                                               | confirmed      | -                             | Yes                                           |
| <i>KMT2A</i>   | NM_001197104            | 1.00       | 0.065        | 3                | -                                                               | confirmed      | 1                             | Yes                                           |
| <i>KMT2C</i>   | NM_170606               | 1.00       | 0.122        | 3                | -                                                               | probable       | 1                             | Yes                                           |
| <i>KMT2D</i>   | NM_003482               | 1.00       | 0.103        | 3                | -                                                               | confirmed      | -                             | NA                                            |
| <i>KMT5B</i>   | NM_017635               | 1.00       | 0.078        | -                | -                                                               | confirmed      | 1                             | NA                                            |
| <i>MBD5</i>    | NM_018328               | 1.00       | 0.136        | 3                | MONDO_0100038 :<br>Moderate                                     | probable       | 1                             | Yes                                           |
| <i>MED13L</i>  | NM_015335               | 1.00       | 0.064        | 3                | -                                                               | probable       | 1                             | Yes                                           |
| <i>MEF2C</i>   | NM_001364333            | 0.02       | 0.608        | 3                | MONDO_0100038 :<br>Definitive                                   | confirmed      | 1                             | Yes                                           |
| <i>MYT1L</i>   | NM_001303052            | 1.00       | 0.087        | 3                | MONDO_0014678 :<br>Definitive                                   | confirmed      | 1                             | Yes                                           |
| <i>NAA15</i>   | NM_057175               | 1.00       | 0.28         | 2                | -                                                               | probable       | 1                             | Yes                                           |
| <i>NBEA</i>    | NM_015678               | 1.00       | 0.074        | 3                | MONDO_0100038 :<br>Definitive                                   | probable       | 1                             | NA                                            |
| <i>NCKAP1</i>  | NM_013436               | 1.00       | 0.044        | 3                | -                                                               | possible       | 1                             | NA                                            |
| <i>NFIX</i>    | NM_001271043            | 1.00       | 0.149        | -                | -                                                               | confirmed      | S                             | Yes                                           |
| <i>NIPBL</i>   | NM_133433               | 1.00       | 0.032        | 3                | MONDO_0016033 :<br>Definitive                                   | confirmed      | 1                             | NA                                            |
| <i>NSD1</i>    | NM_022455               | 1.00       | 0.095        | 3                | MONDO_0019349 :<br>Definitive                                   | confirmed      | 1                             | Yes                                           |
| <i>NSD2</i>    | NM_001042424            | 1.00       | 0.119        | -                | -                                                               | probable       | 2                             | NA                                            |
| <i>PHF21A</i>  | NM_001352027            | 1.00       | 0.08         | 2                | -                                                               | probable       | 1                             | Yes                                           |
| <i>PHIP</i>    | NM_017934               | 1.00       | 0.113        | 2                | -                                                               | confirmed      | 1                             | Yes                                           |
| <i>POGZ</i>    | NM_015100               | 1.00       | 0.119        | 3                | MONDO_0014606 :<br>Definitive                                   | confirmed      | 1                             | Yes                                           |
| <i>PRR12</i>   | NM_020719               | 1.00       | 0.051        | -                | -                                                               | probable       | 1                             | Yes                                           |
| <i>PTEN</i>    | NM_000314               | 0.26       | 0.507        | 3                | MONDO_0017623 :<br>Definitive                                   | confirmed      | 1                             | Yes                                           |
| <i>PURA</i>    | NM_005859               | 0.94       | 0.335        | 3                | MONDO_0100038 :<br>Definitive                                   | confirmed      | -                             | Yes                                           |
| <i>RAI1</i>    | NM_030665               | 1.00       | 0.116        | 3                | MONDO_0008434 :<br>Definitive                                   | confirmed      | 1                             | Yes                                           |
| <i>SATB2</i>   | NM_001172509            | 1.00       | 0.091        | 3                | -                                                               | confirmed      | 3                             | Yes                                           |
| <i>SCN1A</i>   | NM_006920               | 1.00       | 0.071        | 3                | MONDO_0018214 :<br>Definitive                                   | confirmed      | 1                             | NA                                            |
| <i>SCN2A</i>   | NM_001040142            | 1.00       | 0.127        | 3                | MONDO_0100038 :<br>Definitive                                   | confirmed      | 1                             | Yes                                           |
| <i>SETBP1</i>  | NM_015559               | 1.00       | 0.11         | 3                | MONDO_0100038 :<br>Definitive                                   | confirmed      | 1                             | Yes                                           |
| <i>SETD1A</i>  | NM_014712               | 1.00       | 0.136        | 3                | -                                                               | probable       | 1                             | NA                                            |
| <i>SETD2</i>   | NM_014159               | 1.00       | 0.206        | 2                | -                                                               | probable       | 1                             | Yes                                           |
| <i>SETD5</i>   | NM_001080517            | 1.00       | 0.227        | 3                | -                                                               | confirmed      | 1                             | Yes                                           |
| <i>SHANK2</i>  | NM_012309               | 0.00       | 0.458        | 2                | MONDO_0100038 :<br>Definitive                                   | probable       | 1                             | NA                                            |

| Gene           | NCBI Reference sequence | gnomAD PLI | gnomAD LOEUF | ClinGen HI score | ClinGen Gene-disease validity; MONDO DISEASE ID: Classification | DDG2P category | SFARI gene-score <sup>a</sup> | Overlap with Denovo-db NDD genes <sup>b</sup> |
|----------------|-------------------------|------------|--------------|------------------|-----------------------------------------------------------------|----------------|-------------------------------|-----------------------------------------------|
| <i>SHANK3</i>  | NM_033517               | 1.00       | 0.123        | 3                | MONDO_0011652 :<br>Definitive                                   | probable       | 1                             | Yes                                           |
| <i>SLC6A1</i>  | NM_003042               | 1.00       | 0.15         | 3                | -                                                               | confirmed      | 1                             | Yes                                           |
| <i>SON</i>     | NM_138927               | 1.00       | 0.118        | 3                | -                                                               | confirmed      | 1                             | Yes                                           |
| <i>SOX5</i>    | NM_006940               | 1.00       | 0.188        | 3                | -                                                               | probable       | 1                             | Yes                                           |
| <i>STAG1</i>   | NM_005862               | 1.00       | 0.119        | -                | -                                                               | confirmed      | S                             | NA                                            |
| <i>STXBP1</i>  | NM_001032221            | 1.00       | 0.086        | 3                | MONDO_0020071 :<br>Definitive                                   | confirmed      | 1                             | Yes                                           |
| <i>SYNGAP1</i> | NM_006772               | 1.00       | 0.052        | 3                | MONDO_0100038 :<br>Definitive                                   | confirmed      | 1                             | Yes                                           |
| <i>TBR1</i>    | NM_006593               | 1.00       | 0.194        | 3                | MONDO_0100038 :<br>Definitive                                   | confirmed      | 1                             | Yes                                           |
| <i>TCF20</i>   | NM_005650               | 1.00       | 0.095        | 3                | -                                                               | confirmed      | 1                             | Yes                                           |
| <i>TCF4</i>    | NM_001083962            | 1.00       | 0.217        | 3                | MONDO_0012589 :<br>Definitive                                   | confirmed      | 1                             | Yes                                           |
| <i>TLK2</i>    | NM_006852               | 1.00       | 0.114        | -                | -                                                               | confirmed      | 1                             | Yes                                           |
| <i>TNRC6B</i>  | NM_001162501            | 1.00       | 0.173        | 3                | MONDO_0100038 :<br>Definitive                                   | probable       | 2                             | Yes                                           |
| <i>TRIO</i>    | NM_007118               | 1.00       | 0.139        | 3                | -                                                               | probable       | 1                             | NA                                            |
| <i>TRIP12</i>  | NM_001348323            | 1.00       | 0.06         | 3                | -                                                               | confirmed      | 1                             | Yes                                           |
| <i>TSC2</i>    | NM_000548               | 1.00       | 0.074        | 3                | MONDO_0001734 :<br>Definitive                                   | confirmed      | 1                             | NA                                            |
| <i>USP7</i>    | NM_003470               | 1.00       | 0.061        | -                | -                                                               | probable       | 2                             | NA                                            |
| <i>WAC</i>     | NM_016628               | 1.00       | 0.084        | 3                | -                                                               | confirmed      | 1                             | Yes                                           |
| <i>WASF1</i>   | NM_003931               | 1.00       | 0.215        | -                | -                                                               | probable       | S                             | NA                                            |
| <i>WDFY3</i>   | NM_014991               | 1.00       | 0.071        | -                | -                                                               | probable       | 1                             | Yes                                           |
| <i>ZBTB18</i>  | NM_001278196            | 1.00       | 0.179        | 3                | -                                                               | confirmed      | -                             | Yes                                           |
| <i>ZEB2</i>    | NM_014795               | 1.00       | 0.107        | 3                | MONDO_0009341 :<br>Definitive                                   | confirmed      | -                             | NA                                            |
| <i>ZNF292</i>  | NM_015021               | 1.00       | 0.14         | -                | MONDO_0100038 :<br>Definitive                                   | probable       | 1                             | Yes                                           |
| <i>ZNF462</i>  | NM_021224               | 1.00       | 0.085        | 3                | -                                                               | probable       | 1                             | NA                                            |

HI: haploinsufficiency

<sup>a</sup>SFARI gene score 1, 2, 3, and "S" represents High Confidence; Strong Candidate; Suggestive Evidence; and syndromic, respectively

<sup>b</sup>145 NDD genes with excess of LGDs (likely gene disruptive only, excluding missense) described in Coe et al., Nat. Genet. (2018)

LOEUF: gnomAD loss-of-function observed/expected upper bound fraction

MONDO: The Mondo Disease Ontology

**Table S2. ICD-9 and ICD-10 diagnoses codes for neurodevelopmental psychiatric disorders and congenital anomalies<sup>a</sup>**

| <b>A. Neurodevelopmental psychiatric disorders (NPD)</b> |                                                               |                                                                         |
|----------------------------------------------------------|---------------------------------------------------------------|-------------------------------------------------------------------------|
|                                                          | <b>ICD-9 Codes</b>                                            | <b>ICD-10 Codes</b>                                                     |
| Intellectual Disabilities                                | 317, 318.0, 318.1, 318.2, 319                                 | F70, F71, F72, F73, F78, F79                                            |
| Communication Disorders                                  | 315.3, 315.31, 315.32, 315.34, 315.35, 315.39, 307.9          | F80.0, F80.1, F80.2, F80.4, F80.8, F80.81, F80.82, F80.89, F80.9,       |
| Autism Spectrum Disorder                                 | 299.00, 299.80                                                | F84.*                                                                   |
| ADHD                                                     | 314, 314.0, 314.00, 314.01, 314.1, 314.2, 314.8, 314.9        | F90, F90.0, F90.1, F90.2, F90.8, F90.9                                  |
| Specific Learning Disorder                               | 315.0*, 315.1, 315.2                                          | F81, F81.0, F81.2, F81.8, F81.81, F81.89, F81.9                         |
| Motor Disorders                                          | 315.4, 307.2, 307.20, 307.21, 307.22, 307.23, 307.3, 781.3    | F82, F98.4, F95, F95.0, F95.1, F95.2, F95.8, F95.9, R27.0, R27.8, R27.9 |
| Other Neurodevelopmental Disorders                       | 315.5, 315.8, 315.9                                           | F88, F89                                                                |
| Schizophrenia Spectrum and Other Psychotic Disorders     | 295.*, 297.*, 298.*, 301.22                                   | F20.*, F21, F22, F23, F24, F25.*, F28, F29, F06.1                       |
| Bipolar and Related Disorders                            | 296.0*, 296.1*, 296.4*, 296.5*, 296.6*, 296.7, 296.8*         | F30.*, F31.*, F34.0                                                     |
| Depressive Disorders                                     | 296.2*, 296.3*, 311                                           | F32.*, F33.*, F34.1                                                     |
| Anxiety Disorders                                        | 300.0, 300.00, 300.01, 300.02, 300.09, 300.2*, 309.21, 312.23 | F40.*, F41.*, F93.0, F94.0                                              |
| Obsessive-Compulsive and Related Disorders               | 300.3, 300.7, 312.39                                          | F42.*, F45.22, F63.3                                                    |
| Epilepsy                                                 | 345.*                                                         | G40.*                                                                   |
| Cerebral Palsy                                           | 343.*                                                         | G80.*                                                                   |

\*Indicates wildcard character (none or any number)

<sup>a</sup>ICD-9/10diagnosis codes have been described previously(2)

| <b>B. Congenital Anomaly (CA)</b> |                     |                                                      |
|-----------------------------------|---------------------|------------------------------------------------------|
|                                   | <b>ICD-9 Codes</b>  | <b>ICD-10 Codes</b>                                  |
| Central Nervous System            | 740.*, 741.*, 742.* | Q00.*, Q01.*, Q02, Q03.*, Q04.*, Q05.*, Q06.*, Q07.* |

|                  |                                                   |                                                                       |
|------------------|---------------------------------------------------|-----------------------------------------------------------------------|
| Cardiac          | 745.*, 746.*, 747..0, 747.1, 747.2, 747.3, 747.4* | Q20.*, Q21.*, Q22.*, Q23.*, Q24.*, Q25.*, Q26.*                       |
| Cleft lip/palate | 749.*                                             | Q35.*, Q36.*, Q37.*                                                   |
| Genital          | 752.*                                             | Q50.*, Q51.*, Q52.*, Q53, Q53.1*, Q53.0*, Q53.2*, Q54.*, Q55.*, Q56.* |
| Renal/Urinary    | 753.*                                             | Q60.*, Q61.*, Q62.*, Q63.*, Q64.*                                     |

\*Indicates wildcard character (none or any number)

<sup>a</sup>ICD-9/10 diagnosis codes have been described previously (2)

**Table S3. Characteristics of participants with or without a variant or recurrent CNV**

| Demography                | Participants with a variant in NPD genes (n=312) | Participants with a recurrent CNV (n=708) | Participants without variants in NPD genes or recurrent CNV (n=89,577) |
|---------------------------|--------------------------------------------------|-------------------------------------------|------------------------------------------------------------------------|
| <b>Sex</b>                |                                                  |                                           |                                                                        |
| Female                    | 179 (57.3)                                       | 436 (61.6)                                | 54,288 (60.6)                                                          |
| <b>Age</b>                |                                                  |                                           |                                                                        |
| Median age (IQR) [range]  | 56.6 (42-72) [6-97]                              | 54 (39-66) [5-96]                         | 63 (48-74) [5-103]                                                     |
| Aged <18                  | 16 (5.1%)                                        | 27 (3.8%)                                 | 795 (0.9%)                                                             |
| Aged >=18                 | 296 (94.9%)                                      | 681 (96.2%)                               | 88,782 (99.1%)                                                         |
| <b>Race/ethnicity</b>     |                                                  |                                           |                                                                        |
| Non-Hispanic White        | 291 (93.3)                                       | 679 (95.9)                                | 86,144 (96.2)                                                          |
| Black or African American | 9 (2.9)                                          | 17 (2.4)                                  | 1,504 (1.7)                                                            |
| Asian                     | 1 (0.3)                                          | 3 (0.4)                                   | 256 (0.3)                                                              |
| Hispanic or Latino        | 10 (3.2)                                         | 6 (0.8)                                   | 1,383 (1.5)                                                            |
| Other                     | 0 (0.0)                                          | 3 (0.4)                                   | 146 (0.2)                                                              |
| Unknown                   | 1 (0.3)                                          | 0 (0)                                     | 144 (0.2)                                                              |

**Table S4. Prevalence of pathogenic variants in each gene in DiscovEHR cohort**

| <b>Gene</b>    | <b>SNV/indel</b> | <b>NPD gene CNV</b> | <b>Total</b> | <b>Prevalence (%) in DiscovEHR N=90,595</b> | <b>Prevalence in the 1<sup>st</sup> or 2<sup>nd</sup> degree unrelated subset (n=63,632)</b> |
|----------------|------------------|---------------------|--------------|---------------------------------------------|----------------------------------------------------------------------------------------------|
| <i>ADNP</i>    | 1                | -                   | 1            | 0.001                                       | 0.002                                                                                        |
| <i>ANK2</i>    | 26               | -                   | 26           | 0.029                                       | 0.024                                                                                        |
| <i>ANKRD11</i> | 2                | -                   | 2            | 0.002                                       | 0.003                                                                                        |
| <i>ARID1B</i>  | 1                | -                   | 1            | 0.001                                       | 0.002                                                                                        |
| <i>ASH1L</i>   | 13               | -                   | 13           | 0.014                                       | 0.011                                                                                        |
| <i>ASXL3</i>   | 4                | 17                  | 21           | 0.023                                       | 0.014                                                                                        |
| <i>AUTS2</i>   | -                | 1                   | 1            | 0.001                                       | 0.002                                                                                        |
| <i>BRPF1</i>   | 4                | -                   | 4            | 0.004                                       | 0.006                                                                                        |
| <i>CHD2</i>    | 2                | -                   | 2            | 0.002                                       | 0.003                                                                                        |
| <i>CHD7</i>    | 3                | -                   | 3            | 0.003                                       | 0.005                                                                                        |
| <i>CHD8</i>    | 5                | -                   | 5            | 0.006                                       | 0.005                                                                                        |
| <i>CIC</i>     | 4                | -                   | 4            | 0.004                                       | 0.003                                                                                        |
| <i>CLTC</i>    | 5                | -                   | 5            | 0.006                                       | 0.008                                                                                        |
| <i>CSDE1</i>   | 1                | -                   | 1            | 0.001                                       | 0.002                                                                                        |
| <i>CTCF</i>    | 1                | -                   | 1            | 0.001                                       | 0.002                                                                                        |
| <i>CUL3</i>    | 2                | -                   | 2            | 0.002                                       | 0.003                                                                                        |
| <i>DSCAM</i>   | 15               | -                   | 15           | 0.017                                       | 0.019                                                                                        |
| <i>EFTUD2</i>  | 1                | -                   | 1            | 0.001                                       | 0.000                                                                                        |
| <i>EHMT1</i>   | 1                | 1                   | 2            | 0.002                                       | 0.003                                                                                        |
| <i>EP300</i>   | 4                | -                   | 4            | 0.004                                       | 0.006                                                                                        |
| <i>FOXP1</i>   | 2                | 1                   | 3            | 0.003                                       | 0.002                                                                                        |
| <i>GIGYF1</i>  | 15               | -                   | 15           | 0.017                                       | 0.017                                                                                        |
| <i>GRIN2B</i>  | 1                | -                   | 1            | 0.001                                       | 0.002                                                                                        |
| <i>IRF2BPL</i> | 7                | -                   | 7            | 0.008                                       | 0.008                                                                                        |
| <i>KANSL1</i>  | 1                | -                   | 1            | 0.001                                       | 0.002                                                                                        |
| <i>KCNQ2</i>   | 1                | -                   | 1            | 0.001                                       | 0.002                                                                                        |
| <i>KMT2A</i>   | 1                | -                   | 1            | 0.001                                       | 0.000                                                                                        |
| <i>KMT2C</i>   | 13               | 1                   | 14           | 0.015                                       | 0.014                                                                                        |
| <i>KMT2D</i>   | 4                | -                   | 4            | 0.004                                       | 0.005                                                                                        |
| <i>KMT5B</i>   | 1                | -                   | 1            | 0.001                                       | 0.002                                                                                        |
| <i>MBD5</i>    | 4                | -                   | 4            | 0.004                                       | 0.006                                                                                        |
| <i>NAA15</i>   | 6                | -                   | 6            | 0.007                                       | 0.008                                                                                        |
| <i>NBEA</i>    | 4                | -                   | 4            | 0.004                                       | 0.003                                                                                        |
| <i>NCKAP1</i>  | 2                | -                   | 2            | 0.002                                       | 0.003                                                                                        |
| <i>NIPBL</i>   | 2                | -                   | 2            | 0.002                                       | 0.003                                                                                        |
| <i>NSD1</i>    | 3                | -                   | 3            | 0.003                                       | 0.005                                                                                        |

| <b>Gene</b>   | <b>SNV/indel</b> | <b>NPD gene CNV</b> | <b>Total</b> | <b>Prevalence (%) in DiscovEHR N=90,595</b> | <b>Prevalence in the 1<sup>st</sup> or 2<sup>nd</sup> degree unrelated subset (n=63,632)</b> |
|---------------|------------------|---------------------|--------------|---------------------------------------------|----------------------------------------------------------------------------------------------|
| <i>NSD2</i>   | 2                | -                   | 2            | 0.002                                       | 0.003                                                                                        |
| <i>PHIP</i>   | 13               | -                   | 13           | 0.014                                       | 0.017                                                                                        |
| <i>POGZ</i>   | 5                | -                   | 5            | 0.006                                       | 0.005                                                                                        |
| <i>PTEN</i>   | 1                | -                   | 1            | 0.001                                       | 0.002                                                                                        |
| <i>RAI1</i>   | 2                | -                   | 2            | 0.002                                       | 0.002                                                                                        |
| <i>SATB2</i>  | 2                | -                   | 2            | 0.002                                       | 0.002                                                                                        |
| <i>SCN1A</i>  | 1                | -                   | 1            | 0.001                                       | 0.002                                                                                        |
| <i>SCN2A</i>  | 1                | -                   | 1            | 0.001                                       | 0.000                                                                                        |
| <i>SETD1A</i> | 3                | -                   | 3            | 0.003                                       | 0.003                                                                                        |
| <i>SETD2</i>  | 5                | -                   | 5            | 0.006                                       | 0.005                                                                                        |
| <i>SETD5</i>  | 8                | -                   | 8            | 0.009                                       | 0.006                                                                                        |
| <i>SHANK2</i> | 17               | 1                   | 18           | 0.020                                       | 0.017                                                                                        |
| <i>STXBP1</i> | 1                | -                   | 1            | 0.001                                       | 0.002                                                                                        |
| <i>TCF20</i>  | 1                | -                   | 1            | 0.001                                       | 0.002                                                                                        |
| <i>TCF4</i>   | 2                | 1                   | 3            | 0.003                                       | 0.005                                                                                        |
| <i>TLK2</i>   | 1                | -                   | 1            | 0.001                                       | 0.002                                                                                        |
| <i>TNRC6B</i> | 8                | -                   | 8            | 0.009                                       | 0.011                                                                                        |
| <i>TRIO</i>   | 17               | -                   | 17           | 0.019                                       | 0.019                                                                                        |
| <i>TRIP12</i> | 1                | -                   | 1            | 0.001                                       | 0.002                                                                                        |
| <i>TSC2</i>   | 3                | -                   | 3            | 0.003                                       | 0.003                                                                                        |
| <i>WAC</i>    | 3                | -                   | 3            | 0.003                                       | 0.002                                                                                        |
| <i>WASF1</i>  | -                | 1                   | 1            | 0.001                                       | 0.002                                                                                        |
| <i>WDFY3</i>  | 16               | -                   | 16           | 0.018                                       | 0.016                                                                                        |
| <i>ZNF292</i> | 11               | -                   | 11           | 0.012                                       | 0.013                                                                                        |
| <i>ZNF462</i> | 2                | -                   | 2            | 0.002                                       | 0.000                                                                                        |
| Any NPD Gene  | 288              | 24                  | 312          | 0.344                                       | 0.339                                                                                        |

**Table S5. Unique variants in NPD genes included in the study**

| Chr | Pos       | ref        | alt  | Gene               | Refseq         | cDNA             | Protein                  | Consequence          | ACMG evidence                    | ACMG classification |
|-----|-----------|------------|------|--------------------|----------------|------------------|--------------------------|----------------------|----------------------------------|---------------------|
| 20  | 50894171  | CCTAA      | C    | <i>ADNP</i>        | NM_001282531.3 | c.539_542del     | p.Val180GlyfsTer17       | frameshift_variant   | PVS1_strong, PM2                 | LP                  |
| 4   | 113354311 | CAGA<br>A  | C    | <i>ANK2</i>        | NM_001148.6    | c.5697_5700del   | p.Glu1899AspfsTer9<br>4  | frameshift_variant   | PVS1, PM2                        | LP                  |
| 4   | 113354418 | GA         | G    | <i>ANK2</i>        | NM_001148.6    | c.5805del        | p.Lys1935AsnfsTer5<br>9  | frameshift_variant   | PVS1, PM2                        | LP                  |
| 4   | 113355863 | CCGAG<br>C | ATAG | <i>ANK2</i>        | NM_001148.6    | c.7249_7256dup   | p.Val2420IlefsTer13      | frameshift_variant   | PVS1, PM2                        | LP                  |
| 4   | 113356083 | CT         | C    | <i>ANK2</i>        | NM_001148.6    | c.7467del        | p.Pro2490LeufsTer10      | frameshift_variant   | PVS1, PM2                        | LP                  |
| 4   | 113356619 | AC         | A    | <i>ANK2</i>        | NM_001148.6    | c.8003del        | p.Pro2668LeufsTer19      | frameshift_variant   | PVS1, PM2                        | LP                  |
| 4   | 113356972 | C          | G    | <i>ANK2</i>        | NM_001148.6    | c.8354C>G        | p.Ser2785Ter             | stop_gained          | PVS1, PM2                        | LP                  |
| 4   | 113357877 | AC         | A    | <i>ANK2</i>        | NM_001148.6    | c.9263del        | p.Pro3088GlnfsTer24      | frameshift_variant   | PVS1, PM2                        | LP                  |
| 4   | 113358741 | C          | T    | <i>ANK2</i>        | NM_001148.6    | c.10123C>T       | p.Gln3375Ter             | stop_gained          | PVS1, PM2                        | LP                  |
| 4   | 113359097 | ACAG<br>T  | A    | <i>ANK2</i>        | NM_001148.6    | c.10483_10486del | p.Ser3495ArgfsTer6       | frameshift_variant   | PVS1, PM2                        | LP                  |
| 4   | 113363385 | C          | T    | <i>ANK2</i>        | NM_001148.6    | c.10804C>T       | p.Arg3602Ter             | stop_gained          | PVS1, PM2                        | LP                  |
| 4   | 113369650 | G          | T    | <i>ANK2</i>        | NM_001148.6    | c.11455G>T       | p.Glu3819Ter             | stop_gained          | PVS1, PM2                        | LP                  |
| 16  | 89279859  | TC         | T    | <i>ANKRD1</i><br>1 | NM_013275.6    | c.6682del        | p.Glu2228LysfsTer10<br>9 | frameshift_variant   | PVS1, PM2                        | LP                  |
| 16  | 89284375  | CTT        | C    | <i>ANKRD1</i><br>1 | NM_013275.6    | c.2165_2166del   | p.Lys722ArgfsTer19       | frameshift_variant   | PVS1, PM2                        | LP                  |
| 6   | 157181180 | T          | C    | <i>ARID1B</i>      | NM_001346813.1 | c.3465+2T>C      |                          | splice_donor_variant | PVS1_moderate, PS2_moderate, PM2 | LP                  |
| 1   | 155338161 | G          | A    | <i>ASH1L</i>       | NM_018489.3    | c.8731C>T        | p.Arg2911Ter             | stop_gained          | PVS1_strong, PM2                 | LP                  |



| Chr | Pos       | ref | alt | Gene  | Refseq         | cDNA                 | Protein             | Consequence             | ACMG evidence    | ACMG classification |
|-----|-----------|-----|-----|-------|----------------|----------------------|---------------------|-------------------------|------------------|---------------------|
| 1   | 155338203 | CCT | C   | ASH1L | NM_018489.3    | c.8687_8688del       | p.Glu2896GlyfsTer3  | frameshift_variant      | PVS1_strong, PM2 | LP                  |
| 1   | 155338208 | GT  | G   | ASH1L | NM_018489.3    | c.8683del            | p.Thr2895GlnfsTer44 | frameshift_variant      | PVS1_strong, PM2 | LP                  |
| 1   | 155338208 | GT  | GTT | ASH1L | NM_018489.3    | c.8683dup            | p.Thr2895AsnfsTer5  | frameshift_variant      | PVS1_strong, PM2 | LP                  |
| 1   | 155521360 | G   | A   | ASH1L | NM_018489.3    | c.160C>T             | p.Arg54Ter          | stop_gained             | PVS1_strong, PM2 | LP                  |
| 18  | 33671845  | C   | T   | ASXL3 | NM_030632.3    | c.694C>T             | p.Arg232Ter         | stop_gained             | PVS1, PM2        | LP                  |
| 18  | 33683514  | A   | AC  | ASXL3 | NM_030632.3    | c.827dup             | p.Gln277SerfsTer16  | frameshift_variant      | PVS1, PM2        | LP                  |
| 18  | 33739907  | C   | T   | ASXL3 | NM_030632.3    | c.2503C>T            | p.Gln835Ter         | stop_gained             | PVS1, PM2        | LP                  |
| 18  | 33744703  | C   | T   | ASXL3 | NM_030632.3    | c.4855C>T            | p.Gln1619Ter        | stop_gained             | PVS1_strong, PM2 | LP                  |
| 3   | 9734293   | A   | AC  | BRPF1 | NM_004634.2    | c.158dup             | p.Gln54ThrfsTer35   | frameshift_variant      | PVS1, PM2        | LP                  |
| 3   | 9739314   | C   | A   | BRPF1 | NM_004634.2    | c.915C>A             | p.Tyr305Ter         | stop_gained             | PVS1, PM2        | LP                  |
| 3   | 9743701   | C   | CAA | BRPF1 | NM_004634.2    | c.2418_2419insA<br>A | p.Arg807AsnfsTer6   | frameshift_variant      | PVS1, PM2        | LP                  |
| 3   | 9745904   | C   | T   | BRPF1 | NM_004634.2    | c.3280C>T            | p.Arg1094Ter        | stop_gained             | PVS1, PM2        | LP                  |
| 15  | 92981420  | C   | G   | CHD2  | NM_001271.4    | c.3029C>G            | p.Ser1010Ter        | stop_gained             | PVS1, PM2        | LP                  |
| 15  | 92997041  | AG  | A   | CHD2  | NM_001271.4    | c.3682del            | p.Glu1228SerfsTer21 | frameshift_variant      | PVS1, PM2        | LP                  |
| 8   | 60865506  | ACT | A   | CHD7  | NM_017780.4    | c.8570_8571del       | p.Ser2857Ter        | frameshift_variant      | PVS1_strong, PM2 | LP                  |
| 8   | 60865509  | C   | CT  | CHD7  | NM_017780.4    | c.8571dup            | p.Glu2858Ter        | frameshift_variant      | PVS1_strong, PM2 | LP                  |
| 14  | 21386177  | C   | T   | CHD8  | NM_001170629.1 | c.7183-1G>A          |                     | splice_acceptor_variant | PVS1_strong, PM2 | LP                  |

| Chr | Pos       | ref                  | alt | Gene  | Refseq         | cDNA           | Protein             | Consequence                           | ACMG evidence       | ACMG classification |
|-----|-----------|----------------------|-----|-------|----------------|----------------|---------------------|---------------------------------------|---------------------|---------------------|
| 14  | 21397857  | G                    | A   | CHD8  | NM_001170629.1 | c.5017C>T      | p.Arg1673Ter        | stop_gained                           | PVS1, PM2           | LP                  |
| 14  | 21402425  | T                    | A   | CHD8  | NM_001170629.1 | c.3793A>T      | p.Arg1265Ter        | stop_gained                           | PVS1, PM2           | LP                  |
| 14  | 21428046  | C                    | CG  | CHD8  | NM_001170629.1 | c.1423dup      | p.Arg475ProfsTer3   | frameshift_variant                    | PVS1, PM2           | LP                  |
| 16  | 67610883  | TAAAG<br>G           | T   | CTCF  | NM_006565.4    | c.58_62del     | p.Lys20GlufsTer28   | frameshift_variant                    | PVS1_strong,<br>PM2 | LP                  |
| 2   | 224503813 | G                    | A   | CUL3  | NM_003590.5    | c.1216C>T      | p.Gln406Ter         | stop_gained                           | PVS1, PM2           | LP                  |
| 2   | 224535588 | AT                   | A   | CUL3  | NM_003590.5    | c.317del       | p.Asn106IlefsTer12  | frameshift_variant                    | PVS1, PM2           | LP                  |
| 21  | 40078860  | T                    | TA  | DSCAM | NM_001389.5    | c.4537dup      | p.Tyr1513LeufsTer25 | frameshift_variant                    | PVS1, PM2           | LP                  |
| 21  | 40080150  | AC                   | A   | DSCAM | NM_001389.5    | c.4420+1del    |                     | splice_donor_variant                  | PVS1, PM2           | LP                  |
| 21  | 40080152  | C                    | A   | DSCAM | NM_001389.5    | c.4420G>T      | p.Glu1474Ter        | stop_gained&splice_<br>region_variant | PVS1, PM2           | LP                  |
| 21  | 40083982  | G                    | GT  | DSCAM | NM_001389.5    | c.4156dup      | p.Thr1386AsnfsTer36 | frameshift_variant                    | PVS1, PM2           | LP                  |
| 21  | 40087279  | G                    | A   | DSCAM | NM_001389.5    | c.3859C>T      | p.Arg1287Ter        | stop_gained                           | PVS1, PM2           | LP                  |
| 21  | 40093769  | C                    | A   | DSCAM | NM_001389.5    | c.3802G>T      | p.Gly1268Ter        | stop_gained                           | PVS1, PM2           | LP                  |
| 21  | 40134010  | C                    | T   | DSCAM | NM_001389.5    | c.3407-1G>A    |                     | splice_acceptor_vari<br>ant           | PVS1, PM2           | LP                  |
| 21  | 40142587  | ACT                  | A   | DSCAM | NM_001389.5    | c.3375_3376del | p.Arg1125SerfsTer14 | frameshift_variant                    | PVS1, PM2           | LP                  |
| 21  | 40142687  | CG                   | C   | DSCAM | NM_001389.5    | c.3276del      | p.Glu1093LysfsTer6  | frameshift_variant                    | PVS1, PM2           | LP                  |
| 21  | 40179053  | G                    | A   | DSCAM | NM_001389.5    | c.2821C>T      | p.Gln941Ter         | stop_gained                           | PVS1, PM2           | LP                  |
| 21  | 40276151  | CCTT<br>GCAG<br>AGGT | C   | DSCAM | NM_001389.5    | c.2291_2301del | p.Tyr764CysfsTer18  | frameshift_variant                    | PVS1, PM2           | LP                  |
| 21  | 40347731  | G                    | C   | DSCAM | NM_001389.5    | c.1149C>G      | p.Tyr383Ter         | stop_gained                           | PVS1, PM2           | LP                  |

| Chr | Pos       | ref | alt        | Gene          | Refseq         | cDNA                  | Protein             | Consequence          | ACMG evidence       | ACMG classification |
|-----|-----------|-----|------------|---------------|----------------|-----------------------|---------------------|----------------------|---------------------|---------------------|
| 17  | 44876034  | TG  | T          | <i>EFTUD2</i> | NM_004247.4    | c.768del              | p.Cys256Ter         | frameshift_variant   | PVS1, PM2, PS2      | P                   |
| 9   | 137752379 | G   | T          | <i>EHMT1</i>  | NM_024757.5    | c.1219G>T             | p.Glu407Ter         | stop_gained          | PVS1, PM2           | LP                  |
| 22  | 41125976  | C   | A          | <i>EP300</i>  | NM_001429.4    | c.842C>A              | p.Ser281Ter         | stop_gained          | PVS1, PM2           | LP                  |
| 22  | 41166633  | C   | T          | <i>EP300</i>  | NM_001429.4    | c.3841C>T             | p.Arg1281Ter        | stop_gained          | PVS1, PM2           | LP                  |
| 22  | 41168501  | TC  | T          | <i>EP300</i>  | NM_001429.4    | c.3928del             | p.Leu1310Ter        | frameshift_variant   | PVS1, PM2           | LP                  |
| 22  | 41168587  | GC  | G          | <i>EP300</i>  | NM_001429.4    | c.4014del             | p.Met1339Ter        | frameshift_variant   | PVS1, PM2           | LP                  |
| 3   | 70972637  | CA  | C          | <i>FOXP1</i>  | NM_032682.5    | c.1569del             | p.Phe523LeufsTer4   | frameshift_variant   | PVS1, PM2           | LP                  |
| 3   | 71046941  | C   | T          | <i>FOXP1</i>  | NM_032682.5    | c.664+1G>A            |                     | splice_donor_variant | PVS1, PM2           | LP                  |
| 12  | 13563307  | G   | A          | <i>GRIN2B</i> | NM_000834.4    | c.3931C>T             | p.Gln1311Ter        | stop_gained          | PVS1_strong,<br>PM2 | LP                  |
| 17  | 46032106  | G   | A          | <i>KANSL1</i> | NM_015443.3    | c.3031C>T             | p.Arg1011Ter        | stop_gained          | PVS1, PM2           | LP                  |
| 20  | 63414901  | A   | C          | <i>KCNQ2</i>  | NM_172106.2    | c.1471+2T>G           |                     | splice_donor_variant | PVS1, PM2           | LP                  |
| 11  | 118519731 | G   | T          | <i>KMT2A</i>  | NM_001197104.1 | c.11260G>T            | p.Glu3754Ter        | stop_gained          | PVS1, PM2           | LP                  |
| 7   | 152145160 | CA  | C          | <i>KMT2C</i>  | NM_170606.3    | c.14166del            | p.Phe4722LeufsTer3  | frameshift_variant   | PVS1, PM2           | LP                  |
| 7   | 152145252 | C   | CCGTA<br>T | <i>KMT2C</i>  | NM_170606.3    | c.14070_14074dup<br>p | p.Gly4692AspfsTer26 | frameshift_variant   | PVS1, PM2           | LP                  |
| 7   | 152145254 | GTA | G          | <i>KMT2C</i>  | NM_170606.3    | c.14071_14072del      | p.Tyr4691ArgfsTer13 | frameshift_variant   | PVS1, PM2           | LP                  |
| 7   | 152148803 | C   | CA         | <i>KMT2C</i>  | NM_170606.3    | c.13123dup            | p.Cys4375LeufsTer2  | frameshift_variant   | PVS1, PM2           | LP                  |
| 7   | 152151440 | A   | G          | <i>KMT2C</i>  | NM_170606.3    | c.12666+2T>C          |                     | splice_donor_variant | PVS1, PM2           | LP                  |
| 7   | 152152909 | G   | A          | <i>KMT2C</i>  | NM_170606.3    | c.12322C>T            | p.Arg4108Ter        | stop_gained          | PVS1, PM2           | LP                  |

| Chr | Pos       | ref                  | alt | Gene         | Refseq      | cDNA             | Protein                 | Consequence                              | ACMG evidence       | ACMG classification |
|-----|-----------|----------------------|-----|--------------|-------------|------------------|-------------------------|------------------------------------------|---------------------|---------------------|
| 7   | 152156009 | TGGG<br>GTCT<br>GAAG | T   | <i>KMT2C</i> | NM_170606.3 | c.11850_11860del | p.Phe3951GlyfsTer1<br>6 | frameshift_variant                       | PVS1, PM2           | LP                  |
| 7   | 152156034 | GT                   | G   | <i>KMT2C</i> | NM_170606.3 | c.11835del       | p.Lys3945AsnfsTer4<br>2 | frameshift_variant                       | PVS1, PM2           | LP                  |
| 7   | 152156059 | T                    | C   | <i>KMT2C</i> | NM_170606.3 | c.11813-2A>G     |                         | splice_acceptor_variant                  | PVS1, PM2           | LP                  |
| 7   | 152162957 | AG                   | A   | <i>KMT2C</i> | NM_170606.3 | c.10619del       | p.Ser3540LeufsTer10     | frameshift_variant                       | PVS1, PM2           | LP                  |
| 7   | 152163058 | G                    | A   | <i>KMT2C</i> | NM_170606.3 | c.10519C>T       | p.Arg3507Ter            | stop_gained                              | PVS1, PM2           | LP                  |
| 7   | 152163652 | G                    | A   | <i>KMT2C</i> | NM_170606.3 | c.9925C>T        | p.Gln3309Ter            | stop_gained                              | PVS1, PM2           | LP                  |
| 7   | 152176412 | CCA                  | C   | <i>KMT2C</i> | NM_170606.3 | c.9039_9040del   | p.Gly3014AlafsTer10     | frameshift_variant                       | PVS1, PM2           | LP                  |
| 7   | 152315139 | TTCTC                | T   | <i>KMT2C</i> | NM_170606.3 | c.585_588del     | p.Arg196LysfsTer9       | frameshift_variant&splice_region_variant | PVS1, PM2           | LP                  |
| 12  | 49022844  | T                    | TA  | <i>KMT2D</i> | NM_003482.3 | c.16083dup       | p.Lys5362Ter            | frameshift_variant                       | PVS1, PM2           | LP                  |
| 12  | 49027256  | G                    | A   | <i>KMT2D</i> | NM_003482.3 | c.14710C>T       | p.Arg4904Ter            | stop_gained                              | PVS1, PM2           | LP                  |
| 12  | 49038315  | AG                   | A   | <i>KMT2D</i> | NM_003482.3 | c.9040del        | p.Leu3014TrpfsTer15     | frameshift_variant                       | PVS1, PM2           | LP                  |
| 12  | 49038613  | G                    | A   | <i>KMT2D</i> | NM_003482.3 | c.8743C>T        | p.Arg2915Ter            | stop_gained                              | PVS1, PM2           | LP                  |
| 11  | 68175166  | CCTTT                | C   | <i>KMT5B</i> | NM_017635.5 | c.391_394del     | p.Lys131GlufsTer6       | frameshift_variant                       | PVS1_strong,<br>PM2 | LP                  |
| 2   | 148483194 | G                    | GC  | <i>MBD5</i>  | NM_018328.4 | c.2604dup        | p.Val869ArgfsTer20      | frameshift_variant                       | PVS1_strong,<br>PM2 | LP                  |
| 2   | 148485939 | C                    | T   | <i>MBD5</i>  | NM_018328.4 | c.3043C>T        | p.Gln1015Ter            | stop_gained                              | PVS1_strong,<br>PM2 | LP                  |
| 2   | 148489973 | AT                   | A   | <i>MBD5</i>  | NM_018328.4 | c.3643del        | p.Leu1216Ter            | frameshift_variant                       | PVS1_strong,<br>PM2 | LP                  |
| 2   | 148490571 | C                    | T   | <i>MBD5</i>  | NM_018328.4 | c.4240C>T        | p.Gln1414Ter            | stop_gained                              | PVS1_strong,<br>PM2 | LP                  |

| Chr | Pos       | ref | alt | Gene   | Refseq         | cDNA            | Protein             | Consequence             | ACMG evidence         | ACMG classification |
|-----|-----------|-----|-----|--------|----------------|-----------------|---------------------|-------------------------|-----------------------|---------------------|
| 4   | 139336946 | CAT | C   | NAA15  | NM_057175.5    | c.239_240del    | p.His80ArgfsTer17   | frameshift_variant      | PVS1, PM2             | LP                  |
| 4   | 139341049 | C   | T   | NAA15  | NM_057175.5    | c.382C>T        | p.Arg128Ter         | stop_gained             | PVS1, PM2             | LP                  |
| 4   | 139344318 | CT  | C   | NAA15  | NM_057175.5    | c.672del        | p.Ala225LeufsTer2   | frameshift_variant      | PVS1, PM2             | LP                  |
| 4   | 139349476 | C   | T   | NAA15  | NM_057175.5    | c.706C>T        | p.Gln236Ter         | stop_gained             | PVS1, PM2             | LP                  |
| 4   | 139354024 | A   | C   | NAA15  | NM_057175.5    | c.1015-2A>C     |                     | splice_acceptor_variant | PVS1, PM2             | LP                  |
| 13  | 35159100  | A   | T   | NBEA   | NM_015678.4    | c.2929A>T       | p.Lys977Ter         | stop_gained             | PVS1, PM2             | LP                  |
| 13  | 35654928  | T   | A   | NBEA   | NM_015678.4    | c.8046T>A       | p.Cys2682Ter        | stop_gained             | PVS1_strong, PM2      | LP                  |
| 13  | 35667499  | C   | T   | NBEA   | NM_015678.4    | c.8527C>T       | p.Arg2843Ter        | stop_gained             | PVS1_strong, PM2      | LP                  |
| 13  | 35667505  | C   | T   | NBEA   | NM_015678.4    | c.8533C>T       | p.Arg2845Ter        | stop_gained             | PVS1_strong, PM2      | LP                  |
| 2   | 182957598 | T   | C   | NCKAP1 | NM_013436.5    | c.1882-2A>G     |                     | splice_acceptor_variant | PVS1, PM2             | LP                  |
| 2   | 182989028 | AC  | A   | NCKAP1 | NM_013436.5    | c.947+1del      |                     | splice_donor_variant    | PVS1, PM2             | LP                  |
| 5   | 37064721  | G   | A   | NIPBL  | NM_133433.4    | c.8244G>A       | p.Trp2748Ter        | stop_gained             | PVS1_strong, PM2, PP1 | LP                  |
| 5   | 37064854  | C   | T   | NIPBL  | NM_133433.4    | c.8377C>T       | p.Arg2793Ter        | stop_gained             | PVS1_strong, PM2, PP1 | LP                  |
| 5   | 177294239 | C   | T   | NSD1   | NM_022455.4    | c.6871C>T       | p.Gln2291Ter        | stop_gained             | PVS1_strong, PM2      | LP                  |
| 5   | 177294949 | G   | A   | NSD1   | NM_022455.4    | c.7581G>A       | p.Trp2527Ter        | stop_gained             | PVS1_strong, PM2      | LP                  |
| 5   | 177295136 | C   | CT  | NSD1   | NM_022455.4    | c.7768_7769insT | p.Pro2590LeufsTer12 | frameshift_variant      | PVS1_strong, PM2      | LP                  |
| 4   | 1900841   | C   | T   | NSD2   | NM_001042424.3 | c.187C>T        | p.Gln63Ter          | stop_gained             | PVS1, PM2             | LP                  |

| Chr | Pos       | ref       | alt | Gene        | Refseq         | cDNA           | Protein            | Consequence             | ACMG evidence | ACMG classification |
|-----|-----------|-----------|-----|-------------|----------------|----------------|--------------------|-------------------------|---------------|---------------------|
| 4   | 1939695   | C         | T   | <i>NSD2</i> | NM_001042424.3 | c.1798C>T      | p.Arg600Ter        | stop_gained             | PVS1, PM2     | LP                  |
| 6   | 78954945  | T         | A   | <i>PHIP</i> | NM_017934.7    | c.3922A>T      | p.Arg1308Ter       | stop_gained             | PVS1, PM2     | LP                  |
| 6   | 78963242  | AG        | A   | <i>PHIP</i> | NM_017934.7    | c.3389del      | p.Pro1130LeufsTer4 | frameshift_variant      | PVS1, PM2     | LP                  |
| 6   | 78970138  | A         | T   | <i>PHIP</i> | NM_017934.7    | c.3033T>A      | p.Tyr1011Ter       | stop_gained             | PVS1, PM2     | LP                  |
| 6   | 78970815  | GGAT<br>T | G   | <i>PHIP</i> | NM_017934.7    | c.2959_2962del | p.Asn987ProfsTer17 | frameshift_variant      | PVS1, PM2     | LP                  |
| 6   | 78978627  | G         | A   | <i>PHIP</i> | NM_017934.7    | c.2854C>T      | p.Arg952Ter        | stop_gained             | PVS1, PM2     | LP                  |
| 6   | 78990898  | TG        | T   | <i>PHIP</i> | NM_017934.7    | c.2288del      | p.Pro763GlnfsTer50 | frameshift_variant      | PVS1, PM2     | LP                  |
| 6   | 78990938  | GTCTT     | G   | <i>PHIP</i> | NM_017934.7    | c.2245_2248del | p.Lys749LeufsTer11 | frameshift_variant      | PVS1, PM2     | LP                  |
| 6   | 79001932  | G         | A   | <i>PHIP</i> | NM_017934.7    | c.1846C>T      | p.Gln616Ter        | stop_gained             | PVS1, PM2     | LP                  |
| 6   | 79025555  | CA        | C   | <i>PHIP</i> | NM_017934.7    | c.886del       | p.Cys296ValfsTer12 | frameshift_variant      | PVS1, PM2     | LP                  |
| 6   | 79042864  | TC        | T   | <i>PHIP</i> | NM_017934.7    | c.578del       | p.Arg193GlnfsTer15 | frameshift_variant      | PVS1, PM2     | LP                  |
| 6   | 79042911  | G         | A   | <i>PHIP</i> | NM_017934.7    | c.532C>T       | p.Arg178Ter        | stop_gained             | PVS1, PM2     | LP                  |
| 6   | 79043004  | C         | T   | <i>PHIP</i> | NM_017934.7    | c.440-1G>A     |                    | splice_acceptor_variant | PVS1, PM2     | LP                  |
| 6   | 79060767  | G         | A   | <i>PHIP</i> | NM_017934.7    | c.241C>T       | p.Arg81Ter         | stop_gained             | PVS1, PM2     | LP                  |
| 1   | 151423514 | G         | A   | <i>POGZ</i> | NM_015100.4    | c.1561C>T      | p.Gln521Ter        | stop_gained             | PVS1, PM2     | LP                  |
| 1   | 151427985 | G         | A   | <i>POGZ</i> | NM_015100.4    | c.916C>T       | p.Arg306Ter        | stop_gained             | PVS1, PM2     | LP                  |
| 10  | 87933147  | C         | T   | <i>PTEN</i> | NM_000314.7    | c.389C>T       | p.Arg130Ter        | stop_gained             | PVS1, PM2     | LP                  |
| 17  | 17795085  | A         | AC  | <i>RAI1</i> | NM_030665.4    | c.2140dup      | p.Leu714ProfsTer14 | frameshift_variant      | PVS1, PM2     | LP                  |

| Chr | Pos       | ref                                   | alt | Gene          | Refseq         | cDNA            | Protein             | Consequence             | ACMG evidence    | ACMG classification |
|-----|-----------|---------------------------------------|-----|---------------|----------------|-----------------|---------------------|-------------------------|------------------|---------------------|
| 17  | 17796391  | C                                     | G   | <i>RAI1</i>   | NM_030665.4    | c.3443C>G       | p.Ser1148Ter        | stop_gained             | PVS1, PM2        | LP                  |
| 2   | 199308842 | TC                                    | T   | <i>SATB2</i>  | NM_001172509.2 | c.1657del       | p.Asp553MetfsTer71  | frameshift_variant      | PVS1, PM2        | LP                  |
| 2   | 199455954 | TG                                    | T   | <i>SATB2</i>  | NM_001172509.2 | c.83del         | p.Pro28GlnfsTer2    | frameshift_variant      | PVS1, PM2        | LP                  |
| 2   | 165991279 | TG                                    | T   | <i>SCN1A</i>  | NM_006920.5    | c.5962del       | p.Gln1988LysfsTer13 | frameshift_variant      | PVS1_strong, PM2 | LP                  |
| 2   | 165388682 | C                                     | T   | <i>SCN2A</i>  | NM_001040142.2 | c.4876C>T       | p.Arg1626Ter        | stop_gained             | PS2, PM2         | LP                  |
| 16  | 30965117  | T                                     | TC  | <i>SETD1A</i> | NM_014712.3    | c.1375_1376insC | p.Arg461ProfsTer18  | frameshift_variant      | PVS1, PM2        | LP                  |
| 16  | 30967499  | A                                     | G   | <i>SETD1A</i> | NM_014712.3    | c.2683-2A>G     |                     | splice_acceptor_variant | PVS1, PM2        | LP                  |
| 3   | 47056931  | G                                     | A   | <i>SETD2</i>  | NM_014159.6    | c.6853C>T       | p.Gln2285Ter        | stop_gained             | PVS1_strong, PM2 | LP                  |
| 3   | 47056937  | G                                     | A   | <i>SETD2</i>  | NM_014159.6    | c.6847C>T       | p.Gln2283Ter        | stop_gained             | PVS1_strong, PM2 | LP                  |
| 3   | 47086237  | C                                     | CT  | <i>SETD2</i>  | NM_014159.6    | c.5354dup       | p.Leu1786AlafsTer3  | frameshift_variant      | PVS1, PM2        | LP                  |
| 3   | 47106044  | G                                     | A   | <i>SETD2</i>  | NM_014159.6    | c.4792C>T       | p.Arg1598Ter        | stop_gained             | PVS1, PM2        | LP                  |
| 3   | 47124421  | TTC                                   | T   | <i>SETD2</i>  | NM_014159.6    | c.213_214del    | p.Lys72GlyfsTer15   | frameshift_variant      | PVS1, PM2        | LP                  |
| 3   | 9433933   | C                                     | T   | <i>SETD5</i>  | NM_001080517.2 | c.160C>T        | p.Arg54Ter          | stop_gained             | PVS1, PM2        | LP                  |
| 3   | 9434437   | CT                                    | C   | <i>SETD5</i>  | NM_001080517.2 | c.283del        | p.Cys95ValfsTer18   | frameshift_variant      | PVS1, PM2        | LP                  |
| 3   | 9453775   | C                                     | T   | <i>SETD5</i>  | NM_001080517.2 | c.2383C>T       | p.Gln795Ter         | stop_gained             | PVS1, PM2        | LP                  |
| 3   | 9474540   | CCCT<br>CTCC<br>CACAT<br>GGGA<br>GAGT | C   | <i>SETD5</i>  | NM_001080517.2 | c.3590_3609del  | p.Pro1197GlnfsTer24 | frameshift_variant      | PVS1, PM2        | LP                  |
| 11  | 70485387  | G                                     | A   | <i>SHANK2</i> | NM_012309.4    | c.4906C>T       | p.Arg1636Ter        | stop_gained             | PVS1, PM2        | LP                  |

| Chr | Pos       | ref | alt        | Gene   | Refseq         | cDNA                  | Protein            | Consequence          | ACMG evidence | ACMG classification |
|-----|-----------|-----|------------|--------|----------------|-----------------------|--------------------|----------------------|---------------|---------------------|
| 11  | 70490294  | G   | A          | SHANK2 | NM_012309.4    | c.2533C>T             | p.Arg845Ter        | stop_gained          | PVS1, PM2     | LP                  |
| 11  | 71092580  | C   | A          | SHANK2 | NM_012309.4    | c.754G>T              | p.Glu252Ter        | stop_gained          | PVS1, PM2     | LP                  |
| 11  | 71094563  | G   | A          | SHANK2 | NM_012309.4    | c.718C>T              | p.Arg240Ter        | stop_gained          | PVS1, PM2     | LP                  |
| 11  | 71113316  | G   | A          | SHANK2 | NM_012309.4    | c.460C>T              | p.Gln154Ter        | stop_gained          | PVS1, PM2     | LP                  |
| 11  | 71113361  | G   | A          | SHANK2 | NM_012309.4    | c.415C>T              | p.Arg139Ter        | stop_gained          | PVS1, PM2     | LP                  |
| 11  | 71118833  | AG  | A          | SHANK2 | NM_012309.4    | c.406del              | p.Leu136TrpfsTer29 | frameshift_variant   | PVS1, PM2     | LP                  |
| 11  | 71118917  | C   | CTGCA<br>A | SHANK2 | NM_012309.4    | c.322_323insTTG<br>CA | p.Ser108IlefsTer59 | frameshift_variant   | PVS1, PM2     | LP                  |
| 11  | 71118924  | GC  | G          | SHANK2 | NM_012309.4    | c.315del              | p.Gln105HisfsTer60 | frameshift_variant   | PVS1, PM2     | LP                  |
| 9   | 127673250 | C   | T          | STXBP1 | NM_001032221.3 | c.1099C>T             | p.Arg367Ter        | stop_gained          | PVS1, PM2     | LP                  |
| 22  | 42213768  | G   | GAC        | TCF20  | NM_005650.3    | c.1536_1537dup        | p.Ser513CysfsTer8  | frameshift_variant   | PVS1, PM2     | LP                  |
| 18  | 55279573  | G   | GAT        | TCF4   | NM_001083962.1 | c.632_633insAT        | p.Phe211LeufsTer24 | frameshift_variant   | PVS1, PM2     | LP                  |
| 18  | 55403453  | C   | A          | TCF4   | NM_001083962.1 | c.369+1G>T            |                    | splice_donor_variant | PVS1, PM2     | LP                  |
| 17  | 62596650  | AT  | A          | TLK2   | NM_006852.3    | c.1528del             | p.Tyr510ThrfsTer13 | frameshift_variant   | PVS1, PM2     | LP                  |
| 22  | 40265582  | AAG | A          | TNRC6B | NM_001162501.2 | c.1361_1362del        | p.Glu454GlyfsTer17 | frameshift_variant   | PVS1, PM2     | LP                  |
| 22  | 40265617  | C   | T          | TNRC6B | NM_001162501.2 | c.1387C>T             | p.Gln463Ter        | stop_gained          | PVS1, PM2     | LP                  |
| 22  | 40265633  | CA  | C          | TNRC6B | NM_001162501.2 | c.1409del             | p.Asn470MetfsTer33 | frameshift_variant   | PVS1, PM2     | LP                  |
| 22  | 40265717  | G   | A          | TNRC6B | NM_001162501.2 | c.1487G>A             | p.Trp496Ter        | stop_gained          | PVS1, PM2     | LP                  |
| 22  | 40265813  | C   | CA         | TNRC6B | NM_001162501.2 | c.1586dup             | p.Asn529LysfsTer6  | frameshift_variant   | PVS1, PM2     | LP                  |



| Chr | Pos      | ref                  | alt        | Gene   | Refseq         | cDNA                    | Protein                  | Consequence          | ACMG evidence | ACMG classification |
|-----|----------|----------------------|------------|--------|----------------|-------------------------|--------------------------|----------------------|---------------|---------------------|
| 22  | 40280030 | C                    | T          | TNRC6B | NM_001162501.2 | c.3298C>T               | p.Arg1100Ter             | stop_gained          | PVS1, PM2     | LP                  |
| 22  | 40280144 | G                    | A          | TNRC6B | NM_001162501.2 | c.3411+1G>A             |                          | splice_donor_variant | PVS1, PM2     | LP                  |
| 22  | 40315470 | CAG                  | C          | TNRC6B | NM_001162501.2 | c.4867_4868del          | p.Arg1623GlyfsTer17      | frameshift_variant   | PVS1, PM2     | LP                  |
| 5   | 14270830 | C                    | T          | TRIO   | NM_007118.4    | c.163C>T                | p.Arg55Ter               | stop_gained          | PVS1, PM2     | LP                  |
| 5   | 14336650 | C                    | T          | TRIO   | NM_007118.4    | c.1969C>T               | p.Gln657Ter              | stop_gained          | PVS1, PM2     | LP                  |
| 5   | 14336699 | C                    | A          | TRIO   | NM_007118.4    | c.2018C>A               | p.Ser673Ter              | stop_gained          | PVS1, PM2     | LP                  |
| 5   | 14394050 | C                    | T          | TRIO   | NM_007118.4    | c.4231C>T               | p.Arg1411Ter             | stop_gained          | PVS1, PM2     | LP                  |
| 5   | 14398986 | C                    | CAG        | TRIO   | NM_007118.4    | c.4530_4531insA<br>G    | p.Leu1511SerfsTer7       | frameshift_variant   | PVS1, PM2     | LP                  |
| 5   | 14405925 | GGGA<br>GCCC<br>TGAA | G          | TRIO   | NM_007118.4    | c.4802_4812del          | p.Leu1601HisfsTer5       | frameshift_variant   | PVS1, PM2     | LP                  |
| 5   | 14461069 | T                    | TC         | TRIO   | NM_007118.4    | c.5257dup               | p.Leu1753ProfsTer13<br>6 | frameshift_variant   | PVS1, PM2     | LP                  |
| 5   | 14465610 | TG                   | T          | TRIO   | NM_007118.4    | c.5734del               | p.Ala1912GlnfsTer6       | frameshift_variant   | PVS1, PM2     | LP                  |
| 5   | 14476937 | A                    | T          | TRIO   | NM_007118.4    | c.6127A>T               | p.Lys2043Ter             | stop_gained          | PVS1, PM2     | LP                  |
| 5   | 14479312 | G                    | GA         | TRIO   | NM_007118.4    | c.6206dup               | p.His2070AlafsTer8       | frameshift_variant   | PVS1, PM2     | LP                  |
| 5   | 14485209 | C                    | CA         | TRIO   | NM_007118.4    | c.6800dup               | p.Asn2267LysfsTer1<br>74 | frameshift_variant   | PVS1, PM2     | LP                  |
| 5   | 14487650 | TC                   | T          | TRIO   | NM_007118.4    | c.7027del               | p.Gln2343SerfsTer70      | frameshift_variant   | PVS1, PM2     | LP                  |
| 5   | 14487816 | C                    | CCGAG<br>G | TRIO   | NM_007118.4    | c.7188_7189insC<br>GAGG | p.Ala2397ArgfsTer18      | frameshift_variant   | PVS1, PM2     | LP                  |
| 5   | 14492711 | C                    | T          | TRIO   | NM_007118.4    | c.7777C>T               | p.Arg2593Ter             | stop_gained          | PVS1, PM2     | LP                  |

| Chr | Pos       | ref | alt | Gene   | Refseq         | cDNA            | Protein             | Consequence                              | ACMG evidence  | ACMG classification |
|-----|-----------|-----|-----|--------|----------------|-----------------|---------------------|------------------------------------------|----------------|---------------------|
| 5   | 14498579  | C   | A   | TRIO   | NM_007118.4    | c.8271C>A       | p.Tyr2757Ter        | stop_gained                              | PVS1, PM2      | LP                  |
| 2   | 229880040 | G   | A   | TRIP12 | NM_001348323.1 | c.40C>T         | p.Arg14Ter          | stop_gained                              | PVS1, PM2, PS2 | P                   |
| 16  | 2077613   | A   | AC  | TSC2   | NM_000548.5    | c.2853_2854insC | p.Lys954GlnfsTer6   | frameshift_variant                       | PVS1, PM2      | LP                  |
| 16  | 2080179   | C   | T   | TSC2   | NM_000548.5    | c.3412C>T       | p.Arg1138Ter        | stop_gained                              | PVS1, PM2      | LP                  |
| 16  | 2081777   | CCT | C   | TSC2   | NM_000548.5    | c.3796_3797del  | p.Leu1266AlafsTer55 | frameshift_variant                       | PVS1, PM2      | LP                  |
| 10  | 28595945  | C   | T   | WAC    | NM_016628.4    | c.823C>T        | p.Gln275Ter         | stop_gained                              | PVS1, PM2      | LP                  |
| 10  | 28610703  | T   | TA  | WAC    | NM_016628.4    | c.1171dup       | p.Thr391AsnfsTer15  | frameshift_variant                       | PVS1, PM2      | LP                  |
| 10  | 28611772  | A   | T   | WAC    | NM_016628.4    | c.1289-2A>T     |                     | splice_acceptor_variant                  | PVS1, PM2      | LP                  |
| 4   | 84690535  | C   | A   | WDFY3  | NM_014991.4    | c.9334G>T       | p.Glu3112Ter        | stop_gained                              | PVS1, PM2      | LP                  |
| 4   | 84692993  | G   | A   | WDFY3  | NM_014991.4    | c.8941C>T       | p.Arg2981Ter        | stop_gained                              | PVS1, PM2      | LP                  |
| 4   | 84693005  | G   | A   | WDFY3  | NM_014991.4    | c.8929C>T       | p.Arg2977Ter        | stop_gained                              | PVS1, PM2      | LP                  |
| 4   | 84708953  | G   | A   | WDFY3  | NM_014991.4    | c.8173C>T       | p.Gln2725Ter        | stop_gained                              | PVS1, PM2      | LP                  |
| 4   | 84709327  | A   | T   | WDFY3  | NM_014991.4    | c.8063T>A       | p.Leu2688Ter        | stop_gained                              | PVS1, PM2      | LP                  |
| 4   | 84716910  | T   | A   | WDFY3  | NM_014991.4    | c.7861A>T       | p.Arg2621Ter        | stop_gained                              | PVS1, PM2      | LP                  |
| 4   | 84753848  | C   | T   | WDFY3  | NM_014991.4    | c.5588G>A       | p.Trp1863Ter        | stop_gained                              | PVS1, PM2      | LP                  |
| 4   | 84765852  | G   | A   | WDFY3  | NM_014991.4    | c.5146C>T       | p.Gln1716Ter        | stop_gained                              | PVS1, PM2      | LP                  |
| 4   | 84772922  | G   | A   | WDFY3  | NM_014991.4    | c.4762C>T       | p.Gln1588Ter        | stop_gained                              | PVS1, PM2      | LP                  |
| 4   | 84774979  | TC  | T   | WDFY3  | NM_014991.4    | c.4594del       | p.Glu1532LysfsTer8  | frameshift_variant&splice_region_variant | PVS1, PM2      | LP                  |

| Chr | Pos       | ref        | alt | Gene    | Refseq         | cDNA               | Protein             | Consequence                              | ACMG evidence    | ACMG classification |
|-----|-----------|------------|-----|---------|----------------|--------------------|---------------------|------------------------------------------|------------------|---------------------|
| 4   | 84780123  | TC         | T   | WDFY3   | NM_014991.4    | c.4349del          | p.Arg1450LysfsTer26 | frameshift_variant                       | PVS1, PM2        | LP                  |
| 4   | 84831513  | C          | T   | WDFY3   | NM_014991.4    | c.669G>A           | p.Trp223Ter         | stop_gained                              | PVS1, PM2        | LP                  |
| 9   | 106927627 | C          | T   | ZNF462  | NM_021224.6    | c.3715C>T          | p.Arg1239Ter        | stop_gained                              | PVS1, PM2        | LP                  |
| 9   | 106929175 | C          | T   | ZNF462  | NM_021224.6    | c.5263C>T          | p.Gln1755Ter        | stop_gained                              | PVS1, PM2        | LP                  |
| 17  | 59681478  | G          | GGT | CLTC    | NM_004859.3    | c.3249+1_3249+2dup |                     | frameshift_variant&splice_region_variant | PVS1, PM2        | LP                  |
| 17  | 59683936  | CTG        | C   | CLTC    | NM_004859.3    | c.4388_4389del     | p.Val1463GluTer2    | frameshift_variant                       | PVS1, PM2        | LP                  |
| 17  | 59685223  | C          | G   | CLTC    | NM_004859.3    | c.4602C>G          | p.Tyr1534Ter        | stop_gained                              | PVS1, PM2        | LP                  |
| 1   | 114730525 | C          | CT  | CSDE1   | NM_001007553.3 | c.1173dup          | p.Glu392ArgfsTer7   | frameshift_variant                       | PVS1, PM2, PS2   | P                   |
| 14  | 77026542  | C          | CA  | IRF2BPL | NM_024496.4    | c.1250dup          | p.Leu417PhefsTer6   | frameshift_variant                       | PVS1_strong, PM2 | LP                  |
| 14  | 77026685  | T          | TTG | IRF2BPL | NM_024496.4    | c.1107_1108insCA   | p.Ser370GlnfsTer49  | frameshift_variant                       | PVS1_strong, PM2 | LP                  |
| 14  | 77026840  | G          | T   | IRF2BPL | NM_024496.4    | c.953C>A           | p.Ser318Ter         | stop_gained                              | PVS1_strong, PM2 | LP                  |
| 14  | 77027721  | C          | T   | IRF2BPL | NM_024496.4    | c.72G>A            | p.Trp24Ter          | stop_gained                              | PVS1_strong, PM2 | LP                  |
| 6   | 87233385  | TCAAA<br>A | T   | ZNF292  | NM_015021.3    | c.604_608del       | p.Thr202SerfsTer14  | frameshift_variant                       | PVS1, PM2        | LP                  |
| 6   | 87233499  | C          | G   | ZNF292  | NM_015021.3    | c.713C>G           | p.Ser238Ter         | stop_gained                              | PVS1, PM2        | LP                  |
| 6   | 87255301  | C          | T   | ZNF292  | NM_015021.3    | c.1672C>T          | p.Arg558Ter         | stop_gained                              | PVS1_strong, PM2 | LP                  |
| 6   | 87257020  | A          | T   | ZNF292  | NM_015021.3    | c.3391A>T          | p.Lys1131Ter        | stop_gained                              | PVS1_strong, PM2 | LP                  |
| 6   | 87258043  | C          | T   | ZNF292  | NM_015021.3    | c.4414C>T          | p.Arg1472Ter        | stop_gained                              | PVS1_strong, PM2 | LP                  |

| Chr | Pos               | ref        | alt   | Gene   | Refseq         | cDNA            | Protein             | Consequence                       | ACMG evidence         | ACMG classification |
|-----|-------------------|------------|-------|--------|----------------|-----------------|---------------------|-----------------------------------|-----------------------|---------------------|
| 6   | 87258737          | AAG        | A     | ZNF292 | NM_015021.3    | c.5112_5113del  | p.Asn1705PhefsTer6  | frameshift_variant                | PVS1_strong, PM2      | LP                  |
| 6   | 87259787          | CAGA<br>A  | C     | ZNF292 | NM_015021.3    | c.6159_6162del  | p.Glu2054ValfsTer5  | frameshift_variant                | PVS1_strong, PM2, PS2 | P                   |
| 19  | 42292730          | G          | GT    | CIC    | NM_001304815.1 | c.6067_6068insT | p.Ala2023ValfsTer37 | frameshift_variant                | PVS1, PM2, PS2        | P                   |
| 19  | 42293798          | G          | GC    | CIC    | NM_001304815.1 | c.6734dup       | p.Pro2246AlafsTer7  | frameshift_variant                | PVS1, PM2             | LP                  |
| 7   | 100682700         | CTT        | C     | GIGYF1 | NM_022574.5    | c.2488_2489del  | p.Lys830GlufsTer38  | frameshift_variant                | PVS1, PM2             | LP                  |
| 7   | 100683564         | G          | A     | GIGYF1 | NM_022574.5    | c.2038C>T       | p.Gln680Ter         | stop_gained                       | PVS1, PM2             | LP                  |
| 7   | 100684867         | G          | A     | GIGYF1 | NM_022574.5    | c.1318C>T       | p.Gln440Ter         | stop_gained                       | PVS1, PM2             | LP                  |
| 7   | 100685377         | C          | CG    | GIGYF1 | NM_022574.5    | c.1158dup       | p.Glu387ArgfsTer13  | frameshift_variant                | PVS1, PM2             | LP                  |
| 7   | 100685452         | G          | A     | GIGYF1 | NM_022574.5    | c.1084C>T       | p.Gln362Ter         | stop_gained                       | PVS1, PM2             | LP                  |
| 7   | 100686367         | A          | AAATC | GIGYF1 | NM_022574.5    | c.757_760dup    | p.Leu254Ter         | stop_gained&frameshift_variant    | PVS1, PM2             | LP                  |
| 7   | 100686727         | CCT        | C     | GIGYF1 | NM_022574.5    | c.614_615del    | p.Gln205ArgfsTer27  | frameshift_variant                | PVS1, PM2             | LP                  |
| 7   | 100686749         | CCAGT<br>C | T     | GIGYF1 | NM_022574.5    | c.589_593dup    | p.Trp198Ter         | stop_gained&frameshift_variant    | PVS1, PM2             | LP                  |
| 7   | 100686817         | G          | A     | GIGYF1 | NM_022574.5    | c.526C>T        | p.Arg176Ter         | stop_gained&splice_region_variant | PVS1, PM2             | LP                  |
| 7   | 100686821         | T          | G     | GIGYF1 | NM_022574.5    | c.524-2A>C      |                     | splice_acceptor_variant           | PVS1, PM2             | LP                  |
| 7   | 100687323         | G          | A     | GIGYF1 | NM_022574.5    | c.457C>T        | p.Gln153Ter         | stop_gained                       | PVS1, PM2             | LP                  |
| 7   | 100688019         | G          | A     | GIGYF1 | NM_022574.5    | c.127C>T        | p.Arg43Ter          | stop_gained                       | PVS1_strong, PM2      | LP                  |
| 18  | 33607593-33746595 | -          | -     | ASXL3  | NM_030632.3    | -               | -                   | deletion                          | Overlap with HI gene  | P                   |

| Chr | Pos                         | ref | alt | Gene   | Refseq         | cDNA | Protein | Consequence | ACMG evidence        | ACMG classification |
|-----|-----------------------------|-----|-----|--------|----------------|------|---------|-------------|----------------------|---------------------|
| 18  | 33731967-<br>33746596       | -   | -   | ASXL3  | NM_030632.3    | -    | -       | deletion    | Overlap with HI gene | P                   |
| 7   | 70118131-<br>70134572       | -   | -   | AUTS2  | NM_015570.3    | -    | -       | deletion    | PVS1, PM2            | LP                  |
| 9   | 137710966<br>-<br>137762821 | -   | -   | EHMT1  | NM_024757.5    | -    | -       | deletion    | Overlap with HI gene | P                   |
| 3   | 70959246-<br>71542089       | -   | -   | FOXP1  | NM_032682.5    | -    | -       | deletion    | Overlap with HI gene | P                   |
| 7   | 152187261<br>-<br>152263131 | -   | -   | KMT2C  | NM_170606.3    | -    | -       | deletion    | Overlap with HI gene | P                   |
| 11  | 70659827-<br>71094688       | -   | -   | SHANK2 | NM_012309.4    | -    | -       | deletion    | PVS1, PM2            | LP                  |
| 18  | 55228224-<br>55234684       | -   | -   | TCF4   | NM_001083962.1 | -    | -       | deletion    | Overlap with HI gene | P                   |
| 6   | 110100521<br>-<br>110127602 | -   | -   | WASF1  | NM_003931.3    | -    | -       | deletion    | PVS1, PM2            | LP                  |

Chr: Chromosome; Pos: genomic position (GRCh38); Ref: Reference; Alt: alternate sequence; LP: Likely pathogenic; P: Pathogenic; HI: Haploinsufficient (ClinGen dosage sensitivity curated genes with HI score = 3)

**Table S6. Neuropsychiatric developmental disorder diagnoses by gene**

| Gene           | Total | ID | ASD | ADHD | EP | SCZ | BPD | CD | SLD | CP | OCD | OND | MD | Any NPD | Percent Affected |
|----------------|-------|----|-----|------|----|-----|-----|----|-----|----|-----|-----|----|---------|------------------|
| <i>ADNP</i>    | 1     | 1  | 1   | 0    | 0  | 0   | 0   | 0  | 0   | 0  | 0   | 1   | 0  | 1       | 100.0            |
| <i>ANK2</i>    | 26    | 0  | 0   | 2    | 4  | 1   | 4   | 1  | 1   | 0  | 1   | 0   | 2  | 8       | 30.8             |
| <i>ANKRD11</i> | 2     | 0  | 0   | 1    | 0  | 0   | 0   | 1  | 0   | 0  | 0   | 0   | 0  | 1       | 50.0             |
| <i>ARID1B</i>  | 1     | 0  | 0   | 0    | 0  | 0   | 0   | 0  | 0   | 0  | 0   | 0   | 0  | 0       | 0.0              |
| <i>ASH1L</i>   | 13    | 1  | 0   | 0    | 3  | 2   | 0   | 0  | 1   | 0  | 0   | 0   | 2  | 6       | 46.2             |
| <i>ASXL3</i>   | 21    | 2  | 0   | 1    | 2  | 0   | 3   | 0  | 1   | 1  | 0   | 1   | 2  | 6       | 28.6             |
| <i>AUTS2</i>   | 1     | 0  | 0   | 0    | 0  | 0   | 0   | 0  | 0   | 0  | 0   | 0   | 0  | 0       | 0.0              |
| <i>BRPF1</i>   | 4     | 1  | 0   | 1    | 1  | 0   | 0   | 1  | 1   | 0  | 0   | 0   | 0  | 3       | 75.0             |
| <i>CHD2</i>    | 2     | 1  | 0   | 0    | 1  | 0   | 0   | 0  | 0   | 0  | 0   | 0   | 0  | 1       | 50.0             |
| <i>CHD7</i>    | 3     | 0  | 0   | 0    | 0  | 0   | 0   | 0  | 0   | 0  | 0   | 0   | 0  | 0       | 0.0              |
| <i>CHD8</i>    | 5     | 0  | 0   | 0    | 1  | 0   | 0   | 0  | 0   | 0  | 0   | 0   | 0  | 1       | 20.0             |
| <i>CIC</i>     | 4     | 0  | 0   | 2    | 0  | 1   | 1   | 0  | 0   | 0  | 0   | 0   | 0  | 2       | 50.0             |
| <i>CLTC</i>    | 5     | 2  | 2   | 2    | 1  | 0   | 0   | 1  | 0   | 0  | 0   | 2   | 2  | 2       | 40.0             |
| <i>CSDE1</i>   | 1     | 0  | 0   | 0    | 0  | 0   | 1   | 0  | 0   | 0  | 0   | 0   | 0  | 1       | 100.0            |
| <i>CTCF</i>    | 1     | 0  | 0   | 0    | 0  | 0   | 0   | 0  | 0   | 0  | 0   | 0   | 0  | 0       | 0.0              |
| <i>CUL3</i>    | 2     | 0  | 0   | 0    | 1  | 0   | 0   | 0  | 0   | 0  | 0   | 0   | 0  | 1       | 50.0             |
| <i>DSCAM</i>   | 15    | 1  | 0   | 0    | 0  | 1   | 0   | 0  | 0   | 0  | 0   | 0   | 0  | 2       | 13.3             |
| <i>EFTUD2</i>  | 1     | 0  | 0   | 0    | 0  | 0   | 0   | 0  | 0   | 0  | 0   | 0   | 0  | 0       | 0.0              |
| <i>EHMT1</i>   | 2     | 0  | 0   | 0    | 1  | 0   | 0   | 0  | 0   | 0  | 0   | 0   | 0  | 1       | 50.0             |
| <i>EP300</i>   | 4     | 0  | 0   | 0    | 0  | 1   | 0   | 0  | 0   | 0  | 0   | 0   | 0  | 1       | 25.0             |
| <i>FOXP1</i>   | 3     | 0  | 0   | 0    | 0  | 0   | 0   | 0  | 0   | 0  | 0   | 0   | 0  | 0       | 0.0              |
| <i>GIGYF1</i>  | 15    | 1  | 0   | 3    | 2  | 0   | 3   | 1  | 1   | 0  | 0   | 0   | 1  | 6       | 40.0             |
| <i>GRIN2B</i>  | 1     | 0  | 0   | 0    | 1  | 0   | 0   | 0  | 0   | 0  | 0   | 0   | 0  | 1       | 100.0            |
| <i>IRF2BPL</i> | 7     | 0  | 0   | 1    | 0  | 1   | 1   | 0  | 0   | 0  | 0   | 0   | 0  | 3       | 42.9             |
| <i>KANSL1</i>  | 1     | 0  | 0   | 0    | 0  | 0   | 1   | 0  | 0   | 0  | 0   | 1   | 0  | 1       | 100.0            |
| <i>KCNQ2</i>   | 1     | 0  | 0   | 0    | 0  | 0   | 0   | 0  | 0   | 0  | 0   | 0   | 0  | 0       | 0.0              |
| <i>KMT2A</i>   | 1     | 0  | 0   | 0    | 0  | 0   | 0   | 0  | 0   | 0  | 0   | 0   | 0  | 0       | 0.0              |
| <i>KMT2C</i>   | 14    | 0  | 0   | 0    | 0  | 1   | 1   | 0  | 0   | 0  | 0   | 0   | 0  | 1       | 7.1              |
| <i>KMT2D</i>   | 4     | 0  | 0   | 0    | 0  | 1   | 0   | 0  | 0   | 0  | 0   | 0   | 0  | 1       | 25.0             |
| <i>KMT5B</i>   | 1     | 0  | 0   | 1    | 0  | 0   | 0   | 0  | 0   | 0  | 0   | 0   | 0  | 1       | 100.0            |
| <i>MBD5</i>    | 4     | 0  | 0   | 0    | 0  | 0   | 1   | 1  | 0   | 0  | 0   | 0   | 0  | 2       | 50.0             |
| <i>NAA15</i>   | 6     | 0  | 0   | 0    | 2  | 2   | 2   | 0  | 0   | 0  | 0   | 0   | 0  | 3       | 50.0             |
| <i>NBEA</i>    | 4     | 0  | 0   | 0    | 0  | 0   | 0   | 0  | 0   | 0  | 0   | 1   | 0  | 1       | 25.0             |
| <i>NCKAP1</i>  | 2     | 0  | 0   | 0    | 0  | 0   | 0   | 0  | 0   | 0  | 0   | 0   | 0  | 0       | 0.0              |
| <i>NIPBL</i>   | 2     | 0  | 0   | 0    | 0  | 0   | 0   | 1  | 0   | 0  | 0   | 0   | 0  | 1       | 50.0             |
| <i>NSD1</i>    | 3     | 0  | 0   | 0    | 0  | 0   | 0   | 0  | 0   | 0  | 0   | 0   | 0  | 0       | 0.0              |
| <i>NSD2</i>    | 2     | 1  | 0   | 1    | 0  | 0   | 0   | 0  | 0   | 0  | 0   | 1   | 1  | 1       | 50.0             |
| <i>PHIP</i>    | 13    | 0  | 0   | 0    | 1  | 1   | 1   | 0  | 0   | 0  | 0   | 0   | 0  | 2       | 15.4             |
| <i>POGZ</i>    | 5     | 0  | 0   | 2    | 0  | 1   | 0   | 1  | 1   | 0  | 0   | 1   | 0  | 2       | 40.0             |
| <i>PTEN</i>    | 1     | 0  | 0   | 0    | 0  | 0   | 0   | 0  | 0   | 0  | 0   | 0   | 0  | 0       | 0.0              |
| <i>RAI1</i>    | 2     | 0  | 0   | 0    | 1  | 0   | 0   | 0  | 0   | 0  | 0   | 0   | 0  | 1       | 50.0             |
| <i>SATB2</i>   | 2     | 2  | 1   | 2    | 1  | 0   | 0   | 2  | 0   | 0  | 1   | 2   | 1  | 2       | 100.0            |
| <i>SCN1A</i>   | 1     | 0  | 0   | 0    | 1  | 0   | 0   | 0  | 0   | 0  | 0   | 0   | 0  | 1       | 100.0            |
| <i>SCN2A</i>   | 1     | 0  | 0   | 0    | 0  | 0   | 0   | 0  | 0   | 0  | 0   | 0   | 0  | 0       | 0.0              |
| <i>SETD1A</i>  | 3     | 0  | 0   | 0    | 1  | 0   | 2   | 0  | 0   | 0  | 0   | 0   | 0  | 2       | 66.7             |
| <i>SETD2</i>   | 5     | 0  | 0   | 0    | 1  | 1   | 1   | 0  | 1   | 0  | 0   | 0   | 0  | 1       | 20.0             |
| <i>SETD5</i>   | 8     | 0  | 0   | 1    | 0  | 0   | 0   | 1  | 0   | 0  | 0   | 0   | 0  | 1       | 12.5             |
| <i>SHANK2</i>  | 18    | 1  | 0   | 1    | 0  | 2   | 4   | 1  | 2   | 0  | 0   | 0   | 0  | 7       | 38.9             |

| Gene          | Total | ID | ASD | ADHD | EP | SCZ | BPD | CD | SLD | CP | OCD | OND | MD | Any NPD | Percent Affected |
|---------------|-------|----|-----|------|----|-----|-----|----|-----|----|-----|-----|----|---------|------------------|
| <i>STXBP1</i> | 1     | 1  | 1   | 1    | 1  | 1   | 0   | 1  | 0   | 0  | 0   | 1   | 1  | 1       | 100.0            |
| <i>TCF20</i>  | 1     | 1  | 0   | 1    | 0  | 1   | 0   | 0  | 0   | 0  | 0   | 0   | 0  | 1       | 100.0            |
| <i>TCF4</i>   | 3     | 1  | 0   | 0    | 0  | 0   | 0   | 0  | 0   | 1  | 0   | 1   | 1  | 1       | 33.3             |
| <i>TLK2</i>   | 1     | 0  | 0   | 0    | 0  | 0   | 0   | 0  | 0   | 0  | 0   | 0   | 0  | 0       | 0.0              |
| <i>TNRC6B</i> | 8     | 0  | 0   | 1    | 0  | 1   | 0   | 0  | 0   | 0  | 0   | 0   | 0  | 2       | 25.0             |
| <i>TRIO</i>   | 17    | 4  | 1   | 4    | 0  | 2   | 3   | 3  | 1   | 0  | 0   | 3   | 0  | 9       | 52.9             |
| <i>TRIP12</i> | 1     | 1  | 0   | 1    | 0  | 0   | 1   | 0  | 0   | 0  | 1   | 0   | 0  | 1       | 100.0            |
| <i>TSC2</i>   | 3     | 0  | 0   | 0    | 1  | 0   | 1   | 0  | 0   | 0  | 0   | 0   | 0  | 1       | 33.3             |
| <i>WAC</i>    | 3     | 1  | 1   | 1    | 1  | 1   | 1   | 0  | 0   | 0  | 0   | 0   | 0  | 2       | 66.7             |
| <i>WASF1</i>  | 1     | 0  | 0   | 0    | 0  | 0   | 0   | 0  | 0   | 0  | 0   | 0   | 0  | 0       | 0.0              |
| <i>WDFY3</i>  | 16    | 0  | 2   | 2    | 1  | 2   | 2   | 1  | 1   | 0  | 1   | 1   | 0  | 6       | 37.5             |
| <i>ZNF292</i> | 11    | 0  | 0   | 2    | 1  | 0   | 1   | 1  | 1   | 0  | 1   | 0   | 0  | 5       | 45.5             |
| <i>ZNF462</i> | 2     | 0  | 0   | 0    | 0  | 0   | 0   | 0  | 0   | 0  | 0   | 0   | 0  | 0       | 0.0              |
| Any gene      | 312   | 23 | 9   | 34   | 31 | 24  | 35  | 18 | 12  | 2  | 5   | 16  | 13 | 107     | 34.3             |

ID: Intellectual Disability; CD: Communication Disorder; ASD: Autism Spectrum Disorder; ADHD: Attention Deficit and Hyperactivity Disorder; SLD: Specific Learning Disorder; MD: Motor Disorder; OND: Other Neurodevelopmental Disorder; SCZ: Schizophrenia and Related Disorder; BPD: Bipolar Disorder; OCD: Obsessive Compulsive Disorder; EP: Epilepsy; CP: Cerebral Palsy; NPD: Neuropsychiatric developmental Disorder

**Table S7. Congenital anomaly diagnosis by gene**

| <b>Gene</b>    | <b>Total</b> | <b>CNS</b> | <b>Cleft Lip &amp;<br/>Palate</b> | <b>Cardiac</b> | <b>Urinary</b> | <b>Genital</b> | <b>Any CA</b> | <b>Percent<br/>Affected</b> |
|----------------|--------------|------------|-----------------------------------|----------------|----------------|----------------|---------------|-----------------------------|
| <i>ADNP</i>    | 1            | 0          | 0                                 | 0              | 0              | 0              | 0             | 0.0                         |
| <i>ANK2</i>    | 26           | 0          | 0                                 | 0              | 2              | 0              | 2             | 7.7                         |
| <i>ANKRD11</i> | 2            | 0          | 0                                 | 0              | 0              | 0              | 0             | 0.0                         |
| <i>ARID1B</i>  | 1            | 0          | 0                                 | 0              | 0              | 0              | 0             | 0.0                         |
| <i>ASH1L</i>   | 13           | 1          | 0                                 | 0              | 0              | 0              | 1             | 7.7                         |
| <i>ASXL3</i>   | 21           | 1          | 0                                 | 0              | 0              | 0              | 1             | 4.8                         |
| <i>AUTS2</i>   | 1            | 0          | 0                                 | 0              | 0              | 0              | 0             | 0.0                         |
| <i>BRPF1</i>   | 4            | 1          | 0                                 | 0              | 0              | 0              | 1             | 25.0                        |
| <i>CHD2</i>    | 2            | 0          | 0                                 | 0              | 0              | 0              | 0             | 0.0                         |
| <i>CHD7</i>    | 3            | 0          | 0                                 | 0              | 0              | 0              | 0             | 0.0                         |
| <i>CHD8</i>    | 5            | 0          | 0                                 | 0              | 0              | 0              | 0             | 0.0                         |
| <i>CIC</i>     | 4            | 0          | 0                                 | 0              | 0              | 0              | 0             | 0.0                         |
| <i>CLTC</i>    | 5            | 0          | 0                                 | 1              | 0              | 0              | 1             | 20.0                        |
| <i>CSDE1</i>   | 1            | 0          | 0                                 | 0              | 0              | 0              | 0             | 0.0                         |
| <i>CTCF</i>    | 1            | 0          | 0                                 | 0              | 0              | 0              | 0             | 0.0                         |
| <i>CUL3</i>    | 2            | 0          | 0                                 | 0              | 0              | 0              | 0             | 0.0                         |
| <i>DSCAM</i>   | 15           | 0          | 0                                 | 1              | 0              | 0              | 1             | 6.7                         |
| <i>EFTUD2</i>  | 1            | 0          | 0                                 | 0              | 0              | 0              | 0             | 0.0                         |
| <i>EHMT1</i>   | 2            | 0          | 0                                 | 0              | 0              | 0              | 0             | 0.0                         |
| <i>EP300</i>   | 4            | 0          | 0                                 | 0              | 0              | 0              | 0             | 0.0                         |
| <i>FOXP1</i>   | 3            | 0          | 0                                 | 0              | 0              | 0              | 0             | 0.0                         |
| <i>GIGYF1</i>  | 15           | 0          | 0                                 | 1              | 1              | 0              | 2             | 13.3                        |
| <i>GRIN2B</i>  | 1            | 0          | 0                                 | 0              | 0              | 0              | 0             | 0.0                         |
| <i>IRF2BPL</i> | 7            | 0          | 0                                 | 0              | 0              | 0              | 0             | 0.0                         |
| <i>KANSL1</i>  | 1            | 0          | 0                                 | 0              | 0              | 0              | 0             | 0.0                         |
| <i>KCNQ2</i>   | 1            | 0          | 0                                 | 0              | 0              | 0              | 0             | 0.0                         |
| <i>KMT2A</i>   | 1            | 0          | 0                                 | 0              | 0              | 0              | 0             | 0.0                         |
| <i>KMT2C</i>   | 14           | 0          | 0                                 | 0              | 1              | 0              | 1             | 7.1                         |
| <i>KMT2D</i>   | 4            | 0          | 0                                 | 1              | 0              | 0              | 1             | 25.0                        |
| <i>KMT5B</i>   | 1            | 0          | 0                                 | 0              | 0              | 0              | 0             | 0.0                         |
| <i>MBD5</i>    | 4            | 0          | 0                                 | 0              | 0              | 0              | 0             | 0.0                         |
| <i>NAA15</i>   | 6            | 0          | 0                                 | 0              | 1              | 0              | 1             | 16.7                        |
| <i>NBEA</i>    | 4            | 0          | 0                                 | 0              | 0              | 0              | 0             | 0.0                         |
| <i>NCKAP1</i>  | 2            | 0          | 0                                 | 0              | 1              | 0              | 1             | 50.0                        |
| <i>NIPBL</i>   | 2            | 0          | 0                                 | 0              | 0              | 0              | 0             | 0.0                         |
| <i>NSD1</i>    | 3            | 0          | 0                                 | 0              | 0              | 0              | 0             | 0.0                         |
| <i>NSD2</i>    | 2            | 1          | 0                                 | 0              | 0              | 0              | 1             | 50.0                        |
| <i>PHIP</i>    | 13           | 1          | 0                                 | 0              | 0              | 0              | 1             | 7.7                         |
| <i>POGZ</i>    | 5            | 0          | 0                                 | 0              | 0              | 1              | 1             | 20.0                        |
| <i>PTEN</i>    | 1            | 0          | 0                                 | 0              | 0              | 0              | 0             | 0.0                         |
| <i>RAI1</i>    | 2            | 0          | 0                                 | 0              | 0              | 0              | 0             | 0.0                         |
| <i>SATB2</i>   | 2            | 0          | 1                                 | 0              | 0              | 0              | 1             | 50.0                        |
| <i>SCN1A</i>   | 1            | 0          | 0                                 | 0              | 0              | 0              | 0             | 0.0                         |
| <i>SCN2A</i>   | 1            | 0          | 0                                 | 0              | 0              | 0              | 0             | 0.0                         |
| <i>SETD1A</i>  | 3            | 1          | 0                                 | 0              | 0              | 0              | 1             | 33.3                        |
| <i>SETD2</i>   | 5            | 0          | 0                                 | 0              | 0              | 0              | 0             | 0.0                         |
| <i>SETD5</i>   | 8            | 0          | 0                                 | 0              | 0              | 0              | 0             | 0.0                         |
| <i>SHANK2</i>  | 18           | 1          | 0                                 | 0              | 0              | 0              | 1             | 5.6                         |



| <b>Gene</b>             | <b>Total</b> | <b>CNS</b> | <b>Cleft Lip &amp;<br/>Palate</b> | <b>Cardiac</b> | <b>Urinary</b> | <b>Genital</b> | <b>Any CA</b> | <b>Percent<br/>Affected</b> |
|-------------------------|--------------|------------|-----------------------------------|----------------|----------------|----------------|---------------|-----------------------------|
| <i>STXBP1</i>           | 1            | 0          | 0                                 | 0              | 0              | 0              | 0             | 0.0                         |
| <i>TCF20</i>            | 1            | 0          | 0                                 | 0              | 0              | 0              | 0             | 0.0                         |
| <i>TCF4</i>             | 3            | 1          | 0                                 | 0              | 0              | 0              | 1             | 33.3                        |
| <i>TLK2</i>             | 1            | 0          | 0                                 | 0              | 0              | 0              | 0             | 0.0                         |
| <i>TNRC6B</i>           | 8            | 1          | 0                                 | 1              | 1              | 2              | 4             | 50.0                        |
| <i>TRIO</i>             | 17           | 2          | 0                                 | 0              | 1              | 1              | 3             | 17.6                        |
| <i>TRIP12</i>           | 1            | 0          | 0                                 | 0              | 1              | 0              | 1             | 100.0                       |
| <i>TSC2</i>             | 3            | 0          | 0                                 | 1              | 0              | 0              | 1             | 33.3                        |
| <i>WAC</i>              | 3            | 0          | 0                                 | 0              | 0              | 0              | 0             | 0.0                         |
| <i>WASF1</i>            | 1            | 1          | 0                                 | 0              | 0              | 0              | 1             | 100.0                       |
| <i>WDFY3</i>            | 16           | 1          | 0                                 | 1              | 0              | 1              | 3             | 18.8                        |
| <i>ZNF292</i>           | 11           | 0          | 0                                 | 1              | 0              | 0              | 1             | 9.1                         |
| <i>ZNF462</i>           | 2            | 0          | 0                                 | 0              | 0              | 0              | 0             | 0.0                         |
| <i>Any NPD<br/>gene</i> | 312          | 13         | 1                                 | 8              | 9              | 5              | 34            | 10.9                        |

CA: congenital anomaly; CNS: central nervous system

**Table S8. Chart review of individuals with a variant in selected NPD genes**

| Gene        | N <sup>a</sup> | ID   | Age | Sex | Variant                              | NPD diagnosis captured by ICD 9/10 codes approach and confirmed by manual EHR review | NPD symptoms captured only by manual EHR review of unstructured text | Other genetic disorder-related phenotypes captured by manual EHR review |
|-------------|----------------|------|-----|-----|--------------------------------------|--------------------------------------------------------------------------------------|----------------------------------------------------------------------|-------------------------------------------------------------------------|
|             |                | PT-1 | 65  | M   | c.632_633insAT<br>p.Phe211LeufsTer24 | Depressive disorder                                                                  |                                                                      |                                                                         |
| <i>TCF4</i> | 3              | PT-2 | 72  | F   | c.369+1G>T                           |                                                                                      | <b><u>Schizophrenia, bipolar disorder</u></b>                        | Short stature (4'11")                                                   |
|             |                | PT-3 | 8   | M   | Chr18:55228224-55234684 deletion     | Intellectual disability, motor disorder, cerebral palsy                              |                                                                      | Pitt-Hopkins Syndrome, stereotypy (head-shaking), exotropia             |
|             |                | PT-4 | 85  | M   | c.3793A>T<br>(p.Arg1265Ter)          |                                                                                      |                                                                      |                                                                         |
|             |                | PT-5 | 42  | F   | c.5017C>T<br>(p.Arg1673Ter)          | Depressive disorder and anxiety disorder                                             | <b><u>Mild mental retardation</u></b>                                | Migraine, tall stature: Height - 5'11"                                  |
| <i>CHD8</i> | 5              | PT-6 | 65  | F   | c.5017C>T<br>(p.Arg1673Ter)          | Epilepsy, depressive disorder, and anxiety disorder                                  |                                                                      |                                                                         |
|             |                | PT-7 | 48  | M   | c.1423dup<br>(p.Arg475ProfsTer3)     |                                                                                      |                                                                      | Tall stature: Height - 6'9"                                             |
|             |                | PT-8 | 70  | F   | c.7183-1G>A                          | Depressive disorder                                                                  |                                                                      | Suicidal thoughts                                                       |
| <i>TSC2</i> | 3              | PT-9 | 35  | F   | c.3412C>T<br>(p.Arg1138Ter)          | Epilepsy, bipolar disorder, depressive disorder and anxiety disorder                 | <b><u>Learning disability</u></b>                                    | Tuberous Sclerosis                                                      |

| Gene          | N <sup>a</sup> | ID    | Age | Sex | Variant                                 | NPD diagnosis captured by ICD 9/10 codes approach and confirmed by manual EHR review                                       | NPD symptoms captured only by manual EHR review of unstructured text | Other genetic disorder-related phenotypes captured by manual EHR review                                      |
|---------------|----------------|-------|-----|-----|-----------------------------------------|----------------------------------------------------------------------------------------------------------------------------|----------------------------------------------------------------------|--------------------------------------------------------------------------------------------------------------|
|               |                | PT-10 | 75  | F   | c.3796_3797del<br>(p.Leu1266AlafsTer55) |                                                                                                                            |                                                                      |                                                                                                              |
|               |                | PT-11 | 59  | M   | c.2853_2854insC<br>(p.Lys954GlnfsTer6)  | Anxiety disorder                                                                                                           | <b><u>Mild dysarthria</u></b>                                        |                                                                                                              |
| <i>GRIN2B</i> | 1              | PT-13 | 61  | M   | c.3931C>T<br>p.Gln1311Ter               | Epilepsy, depressive disorder and anxiety disorder                                                                         | <b><u>Cognitive Impairment</u></b>                                   | Angry affect, hemiplegia and hemiparesis following unspecified cerebrovascular disease, Cortical dysfunction |
|               |                | PT-14 | 74  | M   | c.16083dup<br>p.Lys5362Ter              | Schizophrenia, depressive disorder, anxiety disorder                                                                       |                                                                      |                                                                                                              |
|               |                | PT-15 | 54  | F   | c.14710C>T<br>p.Arg4904Ter              | Depressive disorder, anxiety disorder                                                                                      |                                                                      |                                                                                                              |
| <i>KMT2D</i>  | 4              | PT-16 | 74  | M   | c.9040del<br>p.Leu3014TrpfsTer15        | Depressive disorder, anxiety disorder                                                                                      | <b><u>Altered mental status, reduced cognitive status</u></b>        | Ptosis                                                                                                       |
|               |                | PT-17 | 82  | M   | c.8743C>T<br>p.Arg2915Ter               |                                                                                                                            |                                                                      | Bilateral sensorineural hearing loss, Vertical Heterophoria, ptosis                                          |
| <i>STXBP1</i> | 1              | PT-10 | 17  | M   | c.1099C>T<br>p.Arg367Ter                | Intellectual disability, ASD, epilepsy, communication disorder, motor disorder, other neurodevelopmental disorder, anxiety |                                                                      |                                                                                                              |

| Gene          | N <sup>a</sup> | ID    | Age | Sex | Variant                          | NPD diagnosis captured by ICD 9/10 codes approach and confirmed by manual EHR review                                                              | NPD symptoms captured only by manual EHR review of unstructured text | Other genetic disorder-related phenotypes captured by manual EHR review |
|---------------|----------------|-------|-----|-----|----------------------------------|---------------------------------------------------------------------------------------------------------------------------------------------------|----------------------------------------------------------------------|-------------------------------------------------------------------------|
| <i>CHD2</i>   | 2              | PT-11 | 82  | M   | c.3029C>G<br>p.Ser1010Ter        | Depression, anxiety                                                                                                                               |                                                                      |                                                                         |
|               |                | PT-12 | 40  | F   | c.3682del<br>p.Glu1228SerfsTer21 | Intellectual disability, epilepsy                                                                                                                 |                                                                      |                                                                         |
| <i>EFTUD2</i> | 1              | PT-9  | 85  | M   | c.768del<br>(p.Cys256Ter)        |                                                                                                                                                   |                                                                      |                                                                         |
| <i>KANSL1</i> | 1              | PT-18 | 28  | F   | c.3031C>T<br>p.Arg1011Ter        | Intellectual disability, bipolar disorder, anxiety disorder                                                                                       |                                                                      | Club foot, chronic headache                                             |
| <i>WAC</i>    | 3              | PT-25 | 90  | F   | c.823C>T<br>p.Gln275Ter          |                                                                                                                                                   |                                                                      |                                                                         |
|               |                | PT-26 | 49  | M   | c.1171dup<br>p.Thr391AsnfsTer15  | Asperger syndrome, ADHD                                                                                                                           |                                                                      |                                                                         |
|               |                | PT-27 | 37  | M   | c.1289-2A>T                      | Intellectual disability, communication disorder, motor disorder, epilepsy, schizophrenia, bipolar disorder, anxiety disorder, depressive disorder |                                                                      |                                                                         |
| <i>NSD1</i>   | 3              | PT-19 | 25  | F   | c.6871C>T<br>p.Gln2291Ter        | Depressive disorder                                                                                                                               |                                                                      | Profound bilateral sensorineural hearing loss                           |
|               |                | PT-20 | 54  | F   | c.7581G>A<br>p.Trp2527Ter        |                                                                                                                                                   |                                                                      |                                                                         |

| Gene | N <sup>a</sup> | ID    | Age | Sex | Variant                                              | <b>NPD diagnosis captured by ICD 9/10 codes approach and confirmed by manual EHR review</b> | <b>NPD symptoms captured only by manual EHR review of unstructured text</b> | <b>Other genetic disorder-related phenotypes captured by manual EHR review</b> |
|------|----------------|-------|-----|-----|------------------------------------------------------|---------------------------------------------------------------------------------------------|-----------------------------------------------------------------------------|--------------------------------------------------------------------------------|
|      |                | PT-21 | 68  | M   | <u>c.7768_7769insT</u><br><u>p.Pro2590LeufsTer12</u> | <u>Depressive disorder,</u><br><u>anxiety disorder</u>                                      |                                                                             |                                                                                |

<sup>a</sup>Number of individuals with variant in each gene

Individuals who did not have ICD codes for NPD diagnosis and were only identified by manual EHR review of unstructured text have their NPD symptoms bolded and underlined.

Additional NPD symptoms identified by chart review but not with ICD codes are underlined among those with various NPD diagnoses.

**Table S9. Association between recurrent NPD-associated CNVs and NPD diagnosis in DiscovEHR cohort**

| Disorder | Odds ratio  | 95% CI lower | 95% CI upper | Corrected p-value        | Uncorrected p-value      | Number of cases with a variant | Total cases | Number of controls with a variant | Total controls |
|----------|-------------|--------------|--------------|--------------------------|--------------------------|--------------------------------|-------------|-----------------------------------|----------------|
| ID       | <b>8.77</b> | 6.05         | 12.38        | <0.0001                  | <0.0001                  | 38                             | 423         | 610                               | 81304          |
| ASD      | <b>3.30</b> | 1.64         | 6.19         | 0.019                    | 1.33 x 10 <sup>-3</sup>  | 13                             | 229         | 635                               | 81498          |
| ADHD     | <b>1.39</b> | 0.98         | 1.93         | 0.914                    | 0.065                    | 41                             | 2397        | 607                               | 79330          |
| EP       | <b>2.19</b> | 1.65         | 2.84         | 3.72 x 10 <sup>-6</sup>  | 2.65 x 10 <sup>-7</sup>  | 59                             | 3311        | 589                               | 78416          |
| SCZ      | <b>1.76</b> | 1.17         | 2.53         | 0.114                    | 8.14 x 10 <sup>-3</sup>  | 27                             | 2234        | 621                               | 79493          |
| BPD      | <b>1.51</b> | 1.12         | 1.99         | 0.114                    | 8.13 x 10 <sup>-3</sup>  | 53                             | 3636        | 595                               | 78091          |
| CD       | <b>2.79</b> | 1.84         | 4.07         | 1.00 x 10 <sup>-4</sup>  | 7.45 x 10 <sup>-6</sup>  | 28                             | 901         | 620                               | 80826          |
| SLD      | <b>3.30</b> | 1.97         | 5.23         | 3.85 x 10 <sup>-4</sup>  | 2.75 x 10 <sup>-5</sup>  | 19                             | 447         | 629                               | 81280          |
| CP       | <b>1.91</b> | 0.53         | 4.79         | >0.99                    | 0.280                    | 3                              | 161         | 645                               | 81566          |
| OCD      | <b>1.07</b> | 0.54         | 1.87         | >0.99                    | 0.838                    | 10                             | 966         | 638                               | 80761          |
| OND      | <b>6.13</b> | 3.82         | 9.51         | 1.52 x 10 <sup>-10</sup> | 1.08 x 10 <sup>-11</sup> | 30                             | 406         | 618                               | 81321          |
| MD       | <b>2.23</b> | 1.41         | 3.32         | 0.014                    | 0.001                    | 22                             | 1196        | 626                               | 80531          |
| AX       | <b>1.14</b> | 0.97         | 1.33         | >0.99                    | 0.110                    | 308                            | 34611       | 340                               | 47116          |
| DP       | <b>1.25</b> | 1.07         | 1.46         | 0.0812                   | 0.006                    | 298                            | 32057       | 350                               | 49670          |

ID: Intellectual Disability; ASD: Autism Spectrum Disorder; ADHD: Attention Deficit and Hyperactivity Disorder; EP: Epilepsy; SCZ: Schizophrenia and Related Disorder; BPD: Bipolar Disorder; CD: Communication Disorder; SLD: Specific Learning Disorder; CP: Cerebral Palsy; OCD: Obsessive Compulsive Disorder; OND: Other Neurodevelopmental Disorder; MD: Motor Disorder; AX: Anxiety; DP: Depressive disorder. Both Bonferroni corrected and uncorrected p-values are presented

**Table S10. Association between LOF variants and NPD diagnosis in the European subset of participants sequenced on the VCRome platform (n=54,597)**

| Disorder | Odds ratio   | 95% CI lower | 95% CI upper | Corrected p-value | Number of cases with a variant | Total cases | Number of controls with a variant | Total controls |
|----------|--------------|--------------|--------------|-------------------|--------------------------------|-------------|-----------------------------------|----------------|
| ID       | <b>6.20</b>  | 2.27         | 13.69        | 0.018             | 5                              | 255         | 165                               | 54342          |
| ASD      | <b>10.77</b> | 2.47         | 34.06        | 0.048             | 3                              | 116         | 167                               | 54481          |
| ADHD     | <b>2.96</b>  | 1.52         | 5.30         | 0.032             | 12                             | 1352        | 158                               | 53245          |
| EP       | <b>2.18</b>  | 1.24         | 3.56         | 0.123             | 15                             | 2310        | 155                               | 52287          |
| SCZ      | <b>2.79</b>  | 1.52         | 4.69         | 0.024             | 13                             | 1700        | 157                               | 52897          |
| BPD      | <b>1.75</b>  | 0.92         | 3.04         | >0.99             | 12                             | 2288        | 158                               | 52309          |
| CD       | <b>2.11</b>  | 0.69         | 4.89         | >0.99             | 4                              | 591         | 166                               | 54006          |
| SLD      | <b>3.37</b>  | 0.90         | 8.92         | 0.938             | 3                              | 284         | 167                               | 54313          |
| CP       | <b>3.91</b>  | 0.44         | 14.54        | >0.99             | 1                              | 103         | 169                               | 54494          |
| OCD      | <b>0.24</b>  | 0.00         | 1.63         | >0.99             | 0                              | 622         | 170                               | 53975          |
| OND      | <b>6.03</b>  | 1.76         | 16.16        | 0.095             | 4                              | 247         | 166                               | 54350          |
| MD       | <b>1.72</b>  | 0.57         | 3.93         | >0.99             | 4                              | 803         | 166                               | 53794          |
| AX       | <b>1.11</b>  | 0.81         | 1.52         | >0.99             | 75                             | 23179       | 95                                | 31418          |
| DP       | <b>1.43</b>  | 1.05         | 1.94         | 0.340             | 83                             | 22376       | 87                                | 32221          |

ID: Intellectual Disability; ASD: Autism Spectrum Disorder; ADHD: Attention Deficit and Hyperactivity Disorder; EP: Epilepsy; SCZ: Schizophrenia and Related Disorder; BPD: Bipolar Disorder; CD: Communication Disorder; SLD: Specific Learning Disorder; CP: Cerebral Palsy; OCD: Obsessive Compulsive Disorder; OND: Other Neurodevelopmental Disorder; MD: Motor Disorder; AX: Anxiety; DP: Depressive disorder. P-values are Bonferroni corrected for 14 tests

**Table S11. Association between LOF variants and NPD diagnosis in the European subset of samples sequenced on the IDT platform (n=27,130)**

| Disorder | Odds ratio   | 95% CI lower | 95% CI upper | Corrected p-value       | Number of cases with a variant | Total cases | Number of controls with a variant | Total controls |
|----------|--------------|--------------|--------------|-------------------------|--------------------------------|-------------|-----------------------------------|----------------|
| ID       | <b>11.65</b> | 5.30         | 23.38        | 1.69 x 10 <sup>-6</sup> | 10                             | 168         | 95                                | 26962          |
| ASD      | <b>2.52</b>  | 0.56         | 8.76         | >0.99                   | 3                              | 113         | 102                               | 27017          |
| ADHD     | <b>2.91</b>  | 1.52         | 5.25         | 0.025                   | 15                             | 1045        | 90                                | 26085          |
| EP       | <b>2.96</b>  | 1.51         | 5.28         | 0.037                   | 11                             | 1001        | 94                                | 26129          |
| SCZ      | <b>3.33</b>  | 1.35         | 6.85         | 0.170                   | 6                              | 534         | 99                                | 26596          |
| BPD      | <b>3.24</b>  | 1.85         | 5.39         | 0.002                   | 17                             | 1348        | 88                                | 25782          |
| CD       | <b>5.38</b>  | 2.32         | 11.27        | 0.004                   | 9                              | 310         | 96                                | 26820          |
| SLD      | <b>9.39</b>  | 3.91         | 20.11        | 1.26 x 10 <sup>-4</sup> | 8                              | 163         | 97                                | 26967          |
| CP       | <b>1.57</b>  | 0.01         | 11.20        | >0.99                   | 0                              | 58          | 105                               | 27072          |
| OCD      | <b>3.49</b>  | 1.29         | 7.64         | 0.245                   | 5                              | 344         | 100                               | 26786          |
| OND      | <b>6.67</b>  | 2.29         | 17.16        | 0.013                   | 7                              | 159         | 98                                | 26971          |
| MD       | <b>2.88</b>  | 0.95         | 6.67         | 0.850                   | 4                              | 393         | 101                               | 26737          |
| AX       | <b>1.20</b>  | 0.81         | 1.78         | 0.113                   | 51                             | 11432       | 54                                | 15698          |
| DP       | <b>1.61</b>  | 1.09         | 2.37         | 0.248                   | 50                             | 9681        | 55                                | 17449          |

ID: Intellectual Disability; ASD: Autism Spectrum Disorder; ADHD: Attention Deficit and Hyperactivity Disorder; EP: Epilepsy; SCZ: Schizophrenia and Related Disorder; BPD: Bipolar Disorder; CD: Communication Disorder; SLD: Specific Learning Disorder; CP: Cerebral Palsy; OCD: Obsessive Compulsive Disorder; OND: Other Neurodevelopmental Disorder; MD: Motor Disorder; AX: Anxiety; DP: Depressive disorder. P-values are Bonferroni corrected for 14 tests



**Table S12. Association between NPD genes pathogenic variants and NPD diagnosis in 1<sup>st</sup> and 2<sup>nd</sup> degree unrelated subset**

| Disorder | Odds ratio  | 95% CI lower | 95% CI upper | Corrected p-value       | Number of cases with a variant | Total cases | Number of controls with a variant | Total controls |
|----------|-------------|--------------|--------------|-------------------------|--------------------------------|-------------|-----------------------------------|----------------|
| ID       | <b>8.65</b> | 4.17         | 16.20        | 9.08 x 10 <sup>-6</sup> | 10                             | 273         | 176                               | 56265          |
| ASD      | <b>6.39</b> | 2.05         | 16.75        | 0.04                    | 5                              | 147         | 181                               | 56391          |
| ADHD     | <b>3.33</b> | 1.97         | 5.38         | 3.46 x 10 <sup>-4</sup> | 21                             | 1625        | 165                               | 54913          |
| EP       | <b>3.01</b> | 1.88         | 4.59         | 2.97 x 10 <sup>-4</sup> | 22                             | 2326        | 164                               | 54212          |
| SCZ      | <b>3.24</b> | 1.81         | 5.37         | 0.004                   | 14                             | 1522        | 172                               | 55016          |
| BPD      | <b>2.29</b> | 1.39         | 3.60         | 0.026                   | 20                             | 2584        | 166                               | 53954          |
| CD       | <b>4.32</b> | 2.11         | 7.95         | 0.003                   | 10                             | 560         | 176                               | 55978          |
| SLD      | <b>8.70</b> | 4.11         | 16.71        | 1.24 x 10 <sup>-5</sup> | 10                             | 266         | 176                               | 56272          |
| CP       | <b>3.28</b> | 0.37         | 12.14        | >0.99                   | 1                              | 102         | 185                               | 56436          |
| OCD      | <b>1.82</b> | 0.60         | 4.15         | >0.99                   | 4                              | 653         | 182                               | 55885          |
| OND      | <b>5.52</b> | 2.10         | 12.77        | 0.016                   | 7                              | 249         | 179                               | 56289          |
| MD       | <b>1.62</b> | 0.54         | 3.68         | >0.99                   | 4                              | 807         | 182                               | 55731          |
| AX       | <b>1.32</b> | 0.98         | 1.77         | >0.99                   | 89                             | 23373       | 97                                | 33165          |
| DP       | <b>1.57</b> | 1.17         | 2.10         | 0.038                   | 90                             | 21480       | 96                                | 35058          |

ID: Intellectual Disability; ASD: Autism Spectrum Disorder; ADHD: Attention Deficit and Hyperactivity Disorder; EP: Epilepsy; SCZ: Schizophrenia and Related Disorder; BPD: Bipolar Disorder; CD: Communication Disorder; SLD: Specific Learning Disorder; CP: Cerebral Palsy; OCD: Obsessive Compulsive Disorder; OND: Other Neurodevelopmental Disorder; MD: Motor Disorder; AX: Anxiety; DP: Depressive disorder. P-values are Bonferroni corrected for 14 tests

**Table S13. Association between NPD genes pathogenic variants and NPD diagnosis after exclusion of individuals age younger than 18 years**

| Disorder | Odds ratio  | 95% CI lower | 95% CI upper | Corrected p-value       | Number of cases with a variant | Total cases | Number of controls with a variant | Total controls |
|----------|-------------|--------------|--------------|-------------------------|--------------------------------|-------------|-----------------------------------|----------------|
| ID       | <b>9.75</b> | 5.14         | 16.89        | 1.18 x 10 <sup>-7</sup> | 12                             | 349         | 256                               | 80774          |
| ASD      | <b>9.08</b> | 3.07         | 22.30        | 4.65 x 10 <sup>-3</sup> | 5                              | 122         | 263                               | 81001          |
| ADHD     | <b>2.88</b> | 1.78         | 4.46         | 6.67 x 10 <sup>-4</sup> | 23                             | 2211        | 245                               | 78912          |
| EP       | <b>2.32</b> | 1.49         | 3.45         | 5.56 x 10 <sup>-3</sup> | 24                             | 3248        | 244                               | 77875          |
| SCZ      | <b>2.91</b> | 1.77         | 4.50         | 0.001                   | 19                             | 2230        | 249                               | 78893          |
| BPD      | <b>2.33</b> | 1.53         | 3.43         | 0.002                   | 28                             | 3629        | 240                               | 77494          |
| CD       | <b>4.12</b> | 2.00         | 7.50         | 0.007                   | 9                              | 663         | 259                               | 80460          |
| SLD      | <b>6.84</b> | 3.35         | 12.57        | 6.02 x 10 <sup>-5</sup> | 10                             | 383         | 258                               | 80740          |
| CP       | <b>2.52</b> | 0.29         | 9.17         | >0.99                   | 1                              | 150         | 267                               | 80973          |
| OCD      | <b>1.27</b> | 0.42         | 2.87         | >0.99                   | 4                              | 953         | 264                               | 80170          |
| OND      | <b>8.36</b> | 3.67         | 16.77        | 1.42 x 10 <sup>-4</sup> | 8                              | 240         | 260                               | 80883          |
| MD       | <b>1.84</b> | 0.76         | 3.70         | >0.99                   | 6                              | 1080        | 262                               | 80043          |
| AX       | <b>1.17</b> | 0.92         | 1.50         | >0.99                   | 125                            | 34463       | 143                               | 46660          |
| DP       | <b>1.52</b> | 1.19         | 1.95         | 0.011                   | 133                            | 32022       | 135                               | 49101          |

ID: Intellectual Disability; ASD: Autism Spectrum Disorder; ADHD: Attention Deficit and Hyperactivity Disorder; EP: Epilepsy; SCZ: Schizophrenia and Related Disorder; BPD: Bipolar Disorder; CD: Communication Disorder; SLD: Specific Learning Disorder; CP: Cerebral Palsy; OCD: Obsessive Compulsive Disorder; OND: Other Neurodevelopmental Disorder; MD: Motor Disorder; AX: Anxiety; DP: Depressive disorder. P-values are Bonferroni corrected for 14 tests

**Table S14. Association between NPD genes pathogenic variants and NPD diagnosis after exclusion of individuals with intellectual disability**

| Disorder | Odds ratio  | 95% CI lower | 95% CI upper | Corrected p-value     | Number of cases with a variant | Total cases | Number of controls with a variant | Total controls |
|----------|-------------|--------------|--------------|-----------------------|--------------------------------|-------------|-----------------------------------|----------------|
| ASD      | <b>4.53</b> | 1.05         | 14.53        | 0.567                 | 3                              | 152         | 257                               | 81152          |
| ADHD     | <b>2.38</b> | 1.40         | 3.83         | 0.026                 | 19                             | 2288        | 241                               | 79016          |
| EP       | <b>2.15</b> | 1.34         | 3.26         | 0.030                 | 21                             | 3187        | 239                               | 78117          |
| SCZ      | <b>2.94</b> | 1.76         | 4.59         | 0.002                 | 18                             | 2159        | 242                               | 79145          |
| BPD      | <b>2.21</b> | 1.42         | 3.30         | 0.010                 | 25                             | 3573        | 235                               | 77731          |
| CD       | <b>3.26</b> | 1.56         | 6.01         | 0.039                 | 9                              | 802         | 251                               | 80502          |
| SLD      | <b>7.49</b> | 3.60         | 14.02        | $3.45 \times 10^{-5}$ | 10                             | 383         | 250                               | 80921          |
| CP       | <b>1.02</b> | 0.01         | 7.02         | >0.99                 | 0                              | 132         | 260                               | 81172          |
| OCD      | <b>1.05</b> | 0.29         | 2.61         | >0.99                 | 3                              | 938         | 257                               | 80366          |
| OND      | <b>5.86</b> | 2.09         | 13.81        | 0.022                 | 6                              | 275         | 254                               | 81029          |
| MD       | <b>1.46</b> | 0.55         | 3.09         | >0.99                 | 5                              | 1145        | 255                               | 80159          |
| AX       | <b>1.17</b> | 0.91         | 1.50         | >0.99                 | 120                            | 34391       | 140                               | 46913          |
| DP       | <b>1.48</b> | 1.15         | 1.90         | 0.027                 | 126                            | 31861       | 134                               | 49443          |

ASD: Autism Spectrum Disorder; ADHD: Attention Deficit and Hyperactivity Disorder; EP: Epilepsy; SCZ: Schizophrenia and Related Disorder; BPD: Bipolar Disorder; CD: Communication Disorder; SLD: Specific Learning Disorder; CP: Cerebral Palsy; OCD: Obsessive Compulsive Disorder; OND: Other Neurodevelopmental Disorder; MD: Motor Disorder; AX: Anxiety; DP: Depressive disorder. P-values are Bonferroni corrected for 13 tests

**Table S15. Association between NPD genes pathogenic variants and NPD diagnosis in European ancestry and all non-Europeans**

| Disorder | Odds ratio   | 95% CI lower | 95% CI upper | Corrected p-value        | Number of cases with a variant | Total cases | Number of controls with a variant | Total controls |
|----------|--------------|--------------|--------------|--------------------------|--------------------------------|-------------|-----------------------------------|----------------|
| ID       | <b>10.63</b> | 6.51         | 16.61        | 4.97 x 10 <sup>-14</sup> | 23                             | 501         | 289                               | 90094          |
| ASD      | <b>3.46</b>  | 1.44         | 7.62         | 0.097                    | 9                              | 309         | 303                               | 90286          |
| ADHD     | <b>2.79</b>  | 1.84         | 4.11         | 6.55 x 10 <sup>-5</sup>  | 34                             | 2783        | 278                               | 87812          |
| EP       | <b>2.44</b>  | 1.65         | 3.47         | 3.79 x 10 <sup>-4</sup>  | 31                             | 3723        | 281                               | 86872          |
| SCZ      | <b>3.28</b>  | 2.11         | 4.86         | 2.31 x 10 <sup>-5</sup>  | 24                             | 2454        | 288                               | 88141          |
| BPD      | <b>2.27</b>  | 1.56         | 3.22         | 7.09 x 10 <sup>-4</sup>  | 35                             | 4172        | 277                               | 86423          |
| CD       | <b>3.55</b>  | 2.07         | 5.76         | 3.04 x 10 <sup>-4</sup>  | 18                             | 1066        | 294                               | 89529          |
| SLD      | <b>4.19</b>  | 2.14         | 7.52         | 0.002                    | 12                             | 517         | 300                               | 90078          |
| CP       | <b>2.78</b>  | 0.58         | 8.03         | >0.99                    | 2                              | 185         | 310                               | 90410          |
| OCD      | <b>1.24</b>  | 0.46         | 2.62         | >0.99                    | 5                              | 1064        | 307                               | 89531          |
| OND      | <b>5.31</b>  | 2.71         | 9.86         | 7.53 x 10 <sup>-5</sup>  | 16                             | 502         | 296                               | 90093          |
| MD       | <b>2.77</b>  | 1.52         | 4.61         | 0.023                    | 13                             | 1339        | 299                               | 89256          |
| AX       | <b>1.09</b>  | 0.86         | 1.37         | >0.99                    | 139                            | 38125       | 173                               | 52470          |
| DP       | <b>1.41</b>  | 1.13         | 1.77         | 0.041                    | 147                            | 35301       | 165                               | 55294          |

ID: Intellectual Disability; ASD: Autism Spectrum Disorder; ADHD: Attention Deficit and Hyperactivity Disorder; EP: Epilepsy; SCZ: Schizophrenia and Related Disorder; BPD: Bipolar Disorder; CD: Communication Disorder; SLD: Specific Learning Disorder; CP: Cerebral Palsy; OCD: Obsessive Compulsive Disorder; OND: Other Neurodevelopmental Disorder; MD: Motor Disorder; AX: Anxiety; DP: Depressive disorder. P-values are Bonferroni corrected for 14 tests

**Table S16. Associations between variants in NPD genes and NPD diagnosis in Black or African Americans**

| Disorder | Odds ratio  | 95% CI lower | 95% CI upper | Corrected p-value | Number of cases with a variant | Total cases | Number of controls with a variant | Total controls |
|----------|-------------|--------------|--------------|-------------------|--------------------------------|-------------|-----------------------------------|----------------|
| ID       | 93.29       | 10.07        | 918.13       | 0.001             | 3                              | 19          | 6                                 | 1507           |
| ASD      | -           | -            | -            | -                 | 2                              | 16          | 7                                 | 1510           |
| ADHD     | -           | -            | -            | -                 | 1                              | 62          | 8                                 | 1464           |
| EP       | -           | -            | -            | -                 | 0                              | 84          | 9                                 | 1442           |
| SCZ      | -           | -            | -            | -                 | 1                              | 46          | 8                                 | 1480           |
| BPD      | -           | -            | -            | -                 | 1                              | 113         | 8                                 | 1413           |
| CD       | -           | -            | -            | -                 | 1                              | 26          | 8                                 | 1500           |
| SLD      | -           | -            | -            | -                 | 0                              | 14          | 9                                 | 1512           |
| CP       | -           | -            | -            | -                 | 0                              | 4           | 9                                 | 1522           |
| OCD      | -           | -            | -            | -                 | 0                              | 7           | 9                                 | 1519           |
| OND      | -           | -            | -            | -                 | 2                              | 27          | 7                                 | 1499           |
| MD       | -           | -            | -            | -                 | 0                              | 21          | 9                                 | 1505           |
| AX       | -           | -            | -            | -                 | 2                              | 568         | 7                                 | 958            |
| DP       | <b>1.37</b> | 0.36         | 4.95         | >0.99             | 4                              | 569         | 5                                 | 957            |

ID: Intellectual Disability; ASD: Autism Spectrum Disorder; ADHD: Attention Deficit and Hyperactivity Disorder; EP: Epilepsy; SCZ: Schizophrenia and Related Disorder; BPD: Bipolar Disorder; CD: Communication Disorder; SLD: Specific Learning Disorder; CP: Cerebral Palsy; OCD: Obsessive Compulsive Disorder; OND: Other Neurodevelopmental Disorder; MD: Motor Disorder; AX: Anxiety; DP: Depressive disorder. P-values are Bonferroni corrected for 14 tests. (-) Odds ratio could not be calculated for all disorders due to the small number of cases with a pathogenic variant

**Table S17. Associations between variants in NPD genes and NPD diagnosis in Hispanic/Latino individuals**

| Disorder | Odds ratio   | 95% CI lower | 95% CI upper | Corrected p-value | Number of cases with a variant | Total cases | Number of controls with a variant | Total controls |
|----------|--------------|--------------|--------------|-------------------|--------------------------------|-------------|-----------------------------------|----------------|
| ID       | -            | -            | -            | -                 | 2                              | 16          | 7                                 | 1282           |
| ASD      | -            | -            | -            | -                 | 0                              | 20          | 9                                 | 1278           |
| ADHD     | -            | -            | -            | -                 | 1                              | 61          | 8                                 | 1237           |
| EP       | -            | -            | -            | -                 | 0                              | 71          | 9                                 | 1227           |
| SCZ      | -            | -            | -            | -                 | 0                              | 37          | 9                                 | 1261           |
| BPD      | -            | -            | -            | -                 | 0                              | 107         | 9                                 | 1191           |
| CD       | -            | -            | -            | -                 | 0                              | 29          | 9                                 | 1269           |
| SLD      | -            | -            | -            | -                 | 1                              | 8           | 8                                 | 1290           |
| CP       | -            | -            | -            | -                 | 1                              | 4           | 8                                 | 1294           |
| OCD      | -            | -            | -            | -                 | 0                              | 17          | 9                                 | 1281           |
| OND      | -            | -            | -            | -                 | 2                              | 18          | 7                                 | 1280           |
| MD       | <b>15.94</b> | 3.14         | 68.79        | 0.025             | 3                              | 26          | 6                                 | 1272           |
| AX       | -            | -            | -            | -                 | 1                              | 563         | 8                                 | 735            |
| DP       | -            | -            | -            | -                 | 1                              | 526         | 8                                 | 772            |

ID: Intellectual Disability; ASD: Autism Spectrum Disorder; ADHD: Attention Deficit and Hyperactivity Disorder; EP: Epilepsy; SCZ: Schizophrenia and Related Disorder; BPD: Bipolar Disorder; CD: Communication Disorder; SLD: Specific Learning Disorder; CP: Cerebral Palsy; OCD: Obsessive Compulsive Disorder; OND: Other Neurodevelopmental Disorder; MD: Motor Disorder; AX: Anxiety; DP: Depressive disorder. P-values are Bonferroni corrected for 14 tests. (-) odds ratio could not be calculated for all disorders due to the small number of cases with a pathogenic variant

**Table S18. Association between NPD genes pathogenic variants and NPD diagnosis based on control group without any NPD diagnoses**

| Disorder | Odds ratio | 95% CI lower | 95% CI upper | Corrected p-value       | Number of cases with a variant | Total cases | Number of controls with a variant | Total controls |
|----------|------------|--------------|--------------|-------------------------|--------------------------------|-------------|-----------------------------------|----------------|
| ID       | 12.23      | 6.31         | 22.42        | 1.86 x 10 <sup>-9</sup> | 15                             | 423         | 85                                | 34590          |
| ASD      | 10.71      | 3.25         | 32.09        | 0.003                   | 6                              | 229         | 85                                | 34590          |
| ADHD     | 3.41       | 1.99         | 5.73         | 2.27 x 10 <sup>-4</sup> | 27                             | 2397        | 85                                | 34590          |
| EP       | 3.09       | 1.95         | 4.75         | 9.65 x 10 <sup>-5</sup> | 26                             | 3311        | 85                                | 34590          |
| SCZ      | 3.65       | 2.16         | 5.86         | 1.16 x 10 <sup>-4</sup> | 19                             | 2234        | 85                                | 34590          |
| BPD      | 3.32       | 2.07         | 5.17         | 2.82 x 10 <sup>-5</sup> | 29                             | 3636        | 85                                | 34590          |
| CD       | 4.25       | 2.14         | 7.87         | 1.53 x 10 <sup>-3</sup> | 13                             | 901         | 85                                | 34590          |
| SLD      | 9.07       | 4.14         | 18.43        | 1.05 x 10 <sup>-5</sup> | 11                             | 447         | 85                                | 34590          |
| CP       | 3.47       | 0.39         | 13.14        | >0.99                   | 1                              | 161         | 85                                | 34590          |
| OCD      | 2.19       | 0.80         | 4.87         | >0.99                   | 5                              | 966         | 85                                | 34590          |
| OND      | 9.4        | 3.65         | 22.88        | 1.52 x 10 <sup>-4</sup> | 11                             | 406         | 85                                | 34590          |
| MD       | 2.79       | 1.27         | 5.36         | 0.187                   | 8                              | 1196        | 85                                | 34590          |
| AX       | 1.47       | 1.11         | 1.96         | 0.109                   | 126                            | 34611       | 85                                | 34590          |
| DP       | 1.72       | 1.30         | 2.28         | 0.002                   | 133                            | 32057       | 85                                | 34590          |

ID: Intellectual Disability; ASD: Autism Spectrum Disorder; ADHD: Attention Deficit and Hyperactivity Disorder; EP: Epilepsy; SCZ: Schizophrenia and Related Disorder; BPD: Bipolar Disorder; CD: Communication Disorder; SLD: Specific Learning Disorder; CP: Cerebral Palsy; OCD: Obsessive Compulsive Disorder; OND: Other Neurodevelopmental Disorder; MD: Motor Disorder; AX: Anxiety; DP: Depressive disorder. P-values are Bonferroni corrected for 14 tests

**Table S19. Association between NPD-associated CNVs and NPD diagnosis based on control group without any NPD diagnoses**

| Disorder | Odds ratio | 95% CI lower | 95% CI upper | Corrected p-value        | Number of cases with a variant | Total cases | Number of controls with a variant | Total controls |
|----------|------------|--------------|--------------|--------------------------|--------------------------------|-------------|-----------------------------------|----------------|
| ID       | 12.29      | 8.18         | 18.07        | <0.0001                  | 38                             | 423         | 212                               | 34590          |
| ASD      | 6.01       | 2.63         | 12.88        | 0.001                    | 13                             | 229         | 212                               | 34590          |
| ADHD     | 1.89       | 1.28         | 2.74         | 0.024                    | 41                             | 2397        | 212                               | 34590          |
| EP       | 2.63       | 1.94         | 3.50         | 5.34 x 10 <sup>-8</sup>  | 59                             | 3311        | 212                               | 34590          |
| SCZ      | 2.08       | 1.36         | 3.05         | 0.015                    | 27                             | 2234        | 212                               | 34590          |
| BPD      | 2.13       | 1.54         | 2.91         | 1.83 x 10 <sup>-4</sup>  | 53                             | 3636        | 212                               | 34590          |
| CD       | 3.39       | 2.16         | 5.13         | 1.00 x 10 <sup>-5</sup>  | 28                             | 901         | 212                               | 34590          |
| SLD      | 4.91       | 2.79         | 8.22         | 6.64 x 10 <sup>-6</sup>  | 19                             | 447         | 212                               | 34590          |
| CP       | 2.86       | 0.79         | 7.25         | >0.99                    | 3                              | 161         | 212                               | 34590          |
| OCD      | 1.53       | 0.76         | 2.74         | >0.99                    | 10                             | 966         | 212                               | 34590          |
| OND      | 8.22       | 4.67         | 14.13        | 1.27 x 10 <sup>-10</sup> | 30                             | 406         | 212                               | 34590          |
| MD       | 2.74       | 1.72         | 4.17         | 1.09 x 10 <sup>-3</sup>  | 22                             | 1196        | 212                               | 34590          |
| AX       | 1.34       | 1.12         | 1.60         | 0.022                    | 308                            | 34611       | 212                               | 34590          |
| DP       | 1.41       | 1.18         | 1.69         | 0.0026                   | 298                            | 32057       | 212                               | 34590          |

ID: Intellectual Disability; ASD: Autism Spectrum Disorder; ADHD: Attention Deficit and Hyperactivity Disorder; EP: Epilepsy; SCZ: Schizophrenia and Related Disorder; BPD: Bipolar Disorder; CD: Communication Disorder; SLD: Specific Learning Disorder; CP: Cerebral Palsy; OCD: Obsessive Compulsive Disorder; OND: Other Neurodevelopmental Disorder; MD: Motor Disorder; AX: Anxiety; DP: Depressive disorder. P-values are Bonferroni corrected for 14 tests
